# Supplementary material
Source: PubMed Central journal article supplement (PMC3434286)
Supplement: NIHMS374183-supplement-supplement_1.pdf [file NIHMS374183-supplement-supplement_1.pdf]

## Supplemental file 1

| Gene Name       | Ensembl ID      | Stob_4b_H | Stob_7b_H | Stob_11b_ | Stob_15b_ | Stob_5b_H | Stob_6b_H |
|-----------------|-----------------|-----------|-----------|-----------|-----------|-----------|-----------|
| No Know Protein | ENSG00000003402 | 1.904994  | 4.385836  | 3.951568  | 3.482052  | 2.535173  | 4.051902  |
| No Know Protein | ENSG00000010610 | 1.764211  | 3.210725  | 3.943274  | 3.295115  | 3.468204  | 2.229702  |
| NPC1L1          | ENSG00000015520 | 2.656872  | 3.796627  | 1.947652  | 2.987368  | 3.145371  | 4.963781  |
| CNTN1           | ENSG00000018236 | 3.095739  | 3.031017  | 3.698424  | 3.174093  | 3.548819  | 2.548159  |
| MRE11A          | ENSG00000020922 | 4.201374  | 3.211796  | 3.489507  | 3.511329  | 3.403861  | 3.959815  |
| OSBPL5          | ENSG00000021762 | 3.669265  | 3.173315  | 2.345421  | 4.428369  | 2.68571   | 4.360942  |
| ABCC2           | ENSG00000023839 | 4.690298  | 6.077605  | 5.581033  | 5.421246  | 5.783863  | 5.808537  |
| ELN             | ENSG00000049540 | 3.794791  | 6.362086  | 7.483618  | 6.757462  | 5.605826  | 5.12839   |
| DMRT3           | ENSG00000064218 | 4.91649   | 4.64308   | 5.487857  | 5.793213  | 5.206725  | 5.157952  |
| PANX2           | ENSG00000073150 | 4.102733  | 3.796627  | 3.22377   | 4.849047  | 2.451346  | 3.79497   |
| SIGLEC1         | ENSG00000088827 | 4.00775   | 5.523088  | 5.152507  | 5.913761  | 5.267594  | 4.223925  |
| No Know Protein | ENSG00000089820 | 3.792629  | 4.823126  | 4.079087  | 4.966555  | 5.141604  | 4.757833  |
| BLNK            | ENSG00000095585 | 2.072264  | 4.212491  | 4.333202  | 3.666953  | 4.454311  | 2.290949  |
| CCDC113         | ENSG00000103021 | 4.897037  | 4.700487  | 4.894987  | 4.581313  | 5.460836  | 4.612953  |
| HOXA3           | ENSG00000105997 | 4.197967  | 4.522756  | 5.829768  | 4.530585  | 5.440954  | 6.072725  |
| No Know Protein | ENSG00000106366 | 2.527888  | 3.653301  | 1.923921  | 2.339675  | 3.469157  | 2.477816  |
| MDN1            | ENSG00000112159 | 3.034728  | 3.562096  | 3.659002  | 4.708552  | 4.226749  | 2.57469   |
| TFEB            | ENSG00000112561 | 3.156751  | 2.774476  | 3.226693  | 2.112202  | 1.309902  | 5.154845  |
| MORC1           | ENSG00000114487 | 3.945362  | 3.302707  | 2.877416  | 2.498904  | 4.365914  | 3.314687  |
| PRG4            | ENSG00000116690 | 4.556383  | 7.176155  | 5.101435  | 7.064308  | 5.981055  | 5.476393  |
| KIAA1622        | ENSG00000119698 | 2.522608  | 1.87422   | 2.601273  | 3.214202  | 2.141768  | 2.302365  |
| TBX4            | ENSG00000121075 | 5.127703  | 5.035704  | 4.828046  | 3.365567  | 5.095303  | 6.032211  |
| No Know Protein | ENSG00000122121 | 5.014194  | 5.600215  | 4.380322  | 5.657265  | 5.401838  | 4.779116  |
| DNAI1           | ENSG00000122735 | 5.224178  | 5.404496  | 4.652856  | 4.486101  | 4.192515  | 3.730359  |
| CALD1           | ENSG00000122786 | 3.150175  | 2.847514  | 4.285627  | 3.613631  | 2.69957   | 4.951966  |
| F13A1           | ENSG00000124491 | 8.132273  | 9.370006  | 9.364108  | 9.830782  | 9.621268  | 9.004704  |

|                 |                 |          |          |          |          |          |          |
|-----------------|-----------------|----------|----------|----------|----------|----------|----------|
| WDFY4           | ENSG00000128815 | 2.53233  | 3.420511 | 3.11133  | 3.254924 | 2.32025  | 2.340838 |
| CNGA4           | ENSG00000132259 | 3.706173 | 2.696054 | 2.388839 | 3.615642 | 3.46216  | 3.030135 |
| SCN7A           | ENSG00000136546 | 2.794775 | 2.700642 | 1.981937 | 3.060586 | 1.933778 | 1.894586 |
| SMC2            | ENSG00000136824 | 2.033947 | 2.932858 | 4.339783 | 3.969121 | 4.068232 | 3.908953 |
| NCBP1           | ENSG00000136937 | 5.531939 | 5.201167 | 6.023277 | 5.851436 | 5.648304 | 5.908408 |
| MYO7A           | ENSG00000137474 | 5.128065 | 4.371737 | 4.919392 | 4.383018 | 5.032747 | 4.328921 |
| SORL1           | ENSG00000137642 | 5.109922 | 5.309692 | 5.260001 | 4.479715 | 4.346154 | 4.884232 |
| DUOX1           | ENSG00000137857 | 4.629466 | 5.434266 | 5.399647 | 6.063739 | 4.286957 | 4.916402 |
| CYP1B1          | ENSG00000138061 | 4.48919  | 6.28447  | 5.710601 | 5.671504 | 6.2506   | 6.024417 |
| No Know Protein | ENSG00000138119 | 4.552639 | 6.082775 | 4.082719 | 5.917199 | 4.106755 | 3.9986   |
| No Know Protein | ENSG00000140538 | 6.200378 | 4.653266 | 4.754058 | 4.24211  | 5.32635  | 5.776096 |
| GATA6           | ENSG00000141448 | 4.299962 | 5.582885 | 5.576902 | 5.133766 | 5.208356 | 3.962272 |
| MAPK4           | ENSG00000141639 | 5.308405 | 3.302707 | 4.08095  | 3.527891 | 4.318915 | 4.599063 |
| No Know Protein | ENSG00000144648 | 3.85235  | 3.206431 | 4.434292 | 4.564029 | 4.144939 | 2.926733 |
| No Know Protein | ENSG00000145536 | 4.378077 | 5.53952  | 5.65494  | 6.443882 | 5.220432 | 5.05507  |
| No Know Protein | ENSG00000151929 | 3.338211 | 4.638033 | 3.930853 | 4.360278 | 4.345055 | 3.697154 |
| ZIC1            | ENSG00000152977 | 3.172884 | 3.375427 | 2.731924 | 3.090269 | 2.953281 | 2.74112  |
| LGI2            | ENSG00000153012 | 2.404775 | 5.052548 | 3.482827 | 3.947586 | 2.681976 | 4.333267 |
| CHODL           | ENSG00000154645 | 2.293503 | 2.209341 | 2.490895 | 2.278937 | 2.242325 | 2.331902 |
| RHOC            | ENSG00000155366 | 4.223521 | 4.563121 | 5.124799 | 5.505307 | 4.862643 | 5.389239 |
| No Know Protein | ENSG00000155657 | 3.544376 | 3.47661  | 4.094804 | 4.53293  | 3.79772  | 3.745308 |
| No Know Protein | ENSG00000155659 | 3.791201 | 6.228934 | 6.070262 | 6.413504 | 5.8308   | 5.266365 |
| SPAG17          | ENSG00000155761 | 3.231198 | 4.755343 | 3.646605 | 4.116496 | 3.362567 | 4.643316 |
| No Know Protein | ENSG00000155926 | 4.365699 | 5.535615 | 4.963825 | 4.53855  | 5.17545  | 4.289977 |
| No Know Protein | ENSG00000158062 | 3.330628 | 3.86005  | 3.458174 | 4.33961  | 4.488491 | 3.446194 |
| No Know Protein | ENSG00000164023 | 5.56215  | 5.647823 | 6.308698 | 6.606853 | 5.85844  | 5.950629 |
| PITX2           | ENSG00000164093 | 5.528798 | 5.011594 | 5.706637 | 5.542145 | 6.02734  | 5.435854 |
| FNDC1           | ENSG00000164694 | 4.211213 | 4.79684  | 5.427722 | 5.78156  | 5.417684 | 5.651512 |

|                        |                 |          |          |          |          |          |          |
|------------------------|-----------------|----------|----------|----------|----------|----------|----------|
| <b>ADCY1</b>           | ENSG00000164742 | 3.984331 | 5.121836 | 3.52779  | 3.19913  | 5.274004 | 4.511014 |
| <b>No Know Protein</b> | ENSG00000165028 | 6.040934 | 5.811829 | 7.195752 | 5.638461 | 6.535346 | 6.791236 |
| <b>FOLR2</b>           | ENSG00000165457 | 5.490414 | 7.121902 | 6.784622 | 6.934891 | 6.88414  | 6.283274 |
| <b>No Know Protein</b> | ENSG00000166501 | 3.156227 | 4.498072 | 3.767685 | 4.263773 | 3.575846 | 3.655146 |
| <b>KIR3DL1</b>         | ENSG00000167633 | 4.202874 | 3.0473   | 4.135085 | 3.056572 | 2.995912 | 2.743656 |
| <b>AXIN2</b>           | ENSG00000168646 | 5.653502 | 6.628345 | 6.829315 | 6.564764 | 6.334571 | 6.57505  |
| <b>MARCH3</b>          | ENSG00000173926 | 3.814941 | 4.167005 | 2.625356 | 4.742575 | 3.956428 | 4.714303 |
| <b>EDG5</b>            | ENSG00000175898 | 3.729435 | 5.404571 | 3.924501 | 4.902445 | 5.527279 | 5.048616 |
| <b>ALX1</b>            | ENSG00000180318 | 3.866906 | 3.377338 | 4.813612 | 4.148414 | 4.893887 | 3.848555 |
| <b>No Know Protein</b> | ENSG00000181007 | 4.733973 | 3.432823 | 3.145371 | 2.393924 | 4.113741 | 3.088592 |
| <b>CCL13</b>           | ENSG00000181374 | 8.009509 | 7.621365 | 7.436957 | 7.823259 | 8.126241 | 7.851955 |
| <b>SEPT9</b>           | ENSG00000184640 | 4.478747 | 4.459269 | 3.94708  | 4.468203 | 3.766431 | 4.299041 |
| <b>No Know Protein</b> | ENSG00000185652 | 3.652545 | 4.005589 | 1.68133  | 3.951305 | 2.014436 | 2.509443 |
| <b>TMEM195</b>         | ENSG00000187546 | 3.832767 | 3.789452 | 3.673208 | 3.973672 | 3.932783 | 5.194784 |
| <b>No Know Protein</b> | ENSG00000189058 | 4.405808 | 4.660495 | 5.000325 | 4.977622 | 4.168536 | 4.239285 |
| <b>No Know Protein</b> | ENSG00000196118 | 2.656872 | 3.908953 | 2.09816  | 1.624897 | 2.535283 | 2.00007  |
| <b>No Know Protein</b> | ENSG00000196154 | 4.267093 | 3.612486 | 2.232261 | 3.499288 | 3.336288 | 2.544649 |
| <b>No Know Protein</b> | ENSG00000198518 | 5.692121 | 6.161181 | 6.942914 | 5.753161 | 6.495145 | 6.462196 |
| <b>SUCNR1</b>          | ENSG00000198829 | 1.973695 | 3.360459 | 3.399412 | 3.682957 | 3.531518 | 3.148953 |
| <b>CR1</b>             | ENSG00000203710 | 3.951783 | 5.546408 | 5.592908 | 5.740066 | 5.283235 | 4.009693 |
| <b>No Know Protein</b> | ENSG00000203858 | 5.412259 | 5.360422 | 3.721676 | 5.713609 | 3.936616 | 5.618123 |
| <b>No Know Protein</b> | ENSG00000224086 | 5.331671 | 4.717739 | 5.277426 | 5.320735 | 5.014381 | 5.511929 |
| <b>No Know Protein</b> | ENSG00000227486 | 3.034728 | 2.17115  | 2.177437 | 3.214202 | 3.591409 | 3.316009 |
| <b>No Know Protein</b> | ENSG00000228486 | 4.629621 | 6.13899  | 5.218716 | 5.176679 | 4.606337 | 6.296757 |
| <b>No Know Protein</b> | ENSG00000230890 | 4.660312 | 3.136063 | 3.201211 | 3.235075 | 3.333384 | 4.283006 |
| <b>No Know Protein</b> | ENSG00000234382 | 4.223521 | 3.676932 | 3.950879 | 3.585392 | 4.332737 | 3.206729 |
| <b>No Know Protein</b> | ENSG00000234840 | 2.64373  | 3.098162 | 4.276488 | 3.333637 | 2.606755 | 4.434066 |
| <b>No Know Protein</b> | ENSG00000240800 | 4.007523 | 6.104494 | 4.930501 | 5.015281 | 3.121117 | 5.526567 |

No Know Protein      ENSG00000244542    7.951473    6.772668    6.185324    6.176063    4.878229    7.902351

| Stob_14b_ | Stob_16b_ | Stob_17b_ | Stob_4d_H | Stob_7d_H | Stob_15d_ | Stob_11f_ | Stob_9a_H | Stob_10a_ | Stob_10a_ |
|-----------|-----------|-----------|-----------|-----------|-----------|-----------|-----------|-----------|-----------|
| 4.8367    | 4.038828  | 4.84514   | 3.362329  | 2.223149  | 3.712515  | 2.504171  | 4.807832  | 4.476173  |           |
| 3.657048  | 2.479048  | 3.273357  | 2.443071  | 2.239997  | 3.856907  | 2.277111  | 2.059043  | 2.390611  |           |
| 4.107366  | 4.207873  | 5.237832  | 3.381403  | 2.995083  | 3.570424  | 2.080387  | 3.684523  | 4.925807  |           |
| 4.366284  | 2.758846  | 3.439027  | 3.4895    | 3.413495  | 2.316055  | 2.690273  | 4.289582  | 2.932567  |           |
| 4.656302  | 4.461021  | 3.047875  | 3.050876  | 2.443371  | 3.306113  | 3.045579  | 4.17188   | 5.341684  |           |
| 3.130852  | 4.539835  | 4.18283   | 4.728084  | 4.67567   | 2.018782  | 2.964596  | 2.645312  | 2.007689  |           |
| 6.596146  | 5.308378  | 5.560705  | 5.311768  | 4.852343  | 5.847336  | 4.8041    | 4.753803  | 4.187187  |           |
| 5.311903  | 4.995956  | 5.021902  | 4.577975  | 5.02382   | 5.465494  | 6.317166  | 3.171867  | 3.647274  |           |
| 5.146726  | 4.924908  | 4.840297  | 4.682416  | 4.149581  | 5.894663  | 5.723904  | 3.181515  | 3.466436  |           |
| 4.237516  | 3.967468  | 4.261036  | 4.121892  | 5.295832  | 3.385621  | 4.182198  | 2.961122  | 2.705647  |           |
| 4.246002  | 5.081681  | 5.612107  | 3.557491  | 4.45952   | 5.316194  | 4.653593  | 3.082384  | 3.627917  |           |
| 5.255727  | 5.160184  | 5.651675  | 4.960135  | 4.395052  | 4.805863  | 5.065719  | 4.265566  | 3.386942  |           |
| 3.221544  | 3.756557  | 4.069957  | 2.412067  | 2.704135  | 3.029564  | 3.285444  | 1.620418  | 1.951776  |           |
| 4.134404  | 3.903905  | 4.174088  | 3.252709  | 4.653305  | 3.998861  | 4.763641  | 3.822416  | 2.90322   |           |
| 5.619396  | 5.243325  | 5.777376  | 5.832605  | 3.254547  | 5.935884  | 5.568009  | 4.013495  | 4.620458  |           |
| 3.091783  | 3.419358  | 3.995443  | 2.194762  | 3.570504  | 2.834359  | 3.567705  | 2.840732  | 1.986308  |           |
| 2.659143  | 2.522608  | 1.684258  | 5.379479  | 3.907466  | 3.126646  | 3.047967  | 1.88321   | 3.403605  |           |
| 2.581578  | 4.683992  | 3.5842    | 3.738727  | 2.57469   | 4.622101  | 3.832275  | 4.898507  | 5.401107  |           |
| 4.472326  | 2.254895  | 2.652991  | 3.228143  | 3.083036  | 3.079281  | 2.79814   | 3.224114  | 3.700629  |           |
| 5.044412  | 5.995959  | 6.871002  | 5.898911  | 5.379852  | 7.857574  | 5.372726  | 4.184777  | 4.520852  |           |
| 3.925753  | 3.234329  | 2.23772   | 1.249677  | 2.772437  | 3.126646  | 2.868511  | 3.961903  | 4.430895  |           |
| 4.834091  | 4.394648  | 4.680862  | 5.672645  | 4.953244  | 3.682165  | 4.454277  | 3.243826  | 3.501718  |           |
| 5.021139  | 5.729623  | 5.981188  | 5.295825  | 4.400944  | 5.334658  | 4.153185  | 2.840661  | 3.944059  |           |
| 2.857955  | 5.191241  | 3.00117   | 4.313303  | 3.288617  | 3.9613    | 4.910134  | 3.557489  | 2.815444  |           |
| 3.060582  | 3.45379   | 3.879     | 3.490332  | 3.595012  | 3.162654  | 3.03298   | 3.493042  | 4.560093  |           |
| 8.852417  | 9.268825  | 9.898358  | 8.672095  | 8.698644  | 9.673082  | 8.680534  | 7.452909  | 7.591612  |           |

|          |          |          |          |          |          |          |          |          |
|----------|----------|----------|----------|----------|----------|----------|----------|----------|
| 3.197941 | 3.075653 | 2.831577 | 2.784619 | 3.093704 | 3.084199 | 1.837642 | 1.856016 | 1.942465 |
| 4.876358 | 2.489027 | 3.095631 | 2.259148 | 3.694708 | 3.528463 | 3.448343 | 2.467497 | 2.775303 |
| 2.134376 | 1.92388  | 1.984684 | 3.438962 | 2.846683 | 2.390879 | 2.324743 | 4.180933 | 3.561001 |
| 3.964219 | 3.829988 | 2.57737  | 2.995587 | 2.29892  | 2.801352 | 3.53312  | 2.683984 | 1.779922 |
| 5.856858 | 5.674311 | 5.178122 | 5.918295 | 6.359415 | 5.328381 | 5.682877 | 3.589136 | 4.071027 |
| 4.139833 | 5.188269 | 4.877743 | 4.685133 | 5.717844 | 5.205485 | 4.535296 | 2.557202 | 4.158254 |
| 5.620197 | 4.175028 | 5.659255 | 5.117695 | 3.874739 | 4.833157 | 5.364491 | 3.682462 | 4.491321 |
| 5.337478 | 5.238511 | 5.553176 | 4.925669 | 4.291568 | 5.770281 | 4.844766 | 3.943494 | 3.646146 |
| 5.265954 | 6.500978 | 6.279005 | 6.242242 | 4.660534 | 5.190389 | 5.642491 | 3.666994 | 4.258518 |
| 5.48721  | 3.644024 | 4.524062 | 5.724756 | 3.449829 | 6.45809  | 4.405863 | 6.209193 | 5.759956 |
| 6.766999 | 3.797967 | 4.713391 | 6.526093 | 5.257461 | 3.57184  | 4.562688 | 6.714749 | 6.729904 |
| 5.368377 | 4.89539  | 4.036966 | 5.460728 | 4.726857 | 3.986517 | 5.351872 | 4.074993 | 3.665133 |
| 3.974931 | 2.96925  | 3.814678 | 4.087488 | 3.711453 | 3.168417 | 4.243993 | 3.28986  | 2.870343 |
| 3.749968 | 4.41818  | 3.158768 | 3.600149 | 4.749476 | 5.141657 | 3.362764 | 2.707976 | 2.808491 |
| 4.969028 | 4.558576 | 5.054454 | 5.759491 | 4.668363 | 5.527956 | 4.60477  | 3.356672 | 4.438588 |
| 4.314837 | 4.198898 | 4.54264  | 4.37844  | 3.847754 | 4.75685  | 4.664693 | 3.538713 | 2.660265 |
| 2.61725  | 2.40837  | 2.428422 | 3.311967 | 3.321512 | 2.83967  | 2.808929 | 5.337994 | 4.390736 |
| 2.929464 | 4.361084 | 4.382866 | 2.614043 | 2.59338  | 3.256376 | 3.605752 | 2.000597 | 2.454015 |
| 3.865776 | 2.011832 | 2.933719 | 2.706494 | 2.187786 | 2.584072 | 2.163202 | 4.494489 | 4.900422 |
| 4.331185 | 4.461021 | 5.448415 | 3.249731 | 5.156602 | 4.827896 | 4.723876 | 3.489507 | 2.905207 |
| 3.815184 | 4.206766 | 4.458948 | 2.502459 | 2.872647 | 3.924912 | 3.831587 | 2.931567 | 3.103954 |
| 5.02923  | 5.237023 | 5.563798 | 4.710563 | 4.653224 | 5.958927 | 5.480105 | 3.878967 | 3.835825 |
| 4.947777 | 5.411804 | 4.814455 | 3.909359 | 3.363478 | 3.850382 | 3.822427 | 2.89266  | 3.03279  |
| 4.783977 | 4.556749 | 5.976385 | 3.120804 | 4.793915 | 3.458232 | 3.973106 | 3.567281 | 3.282018 |
| 3.95879  | 3.55162  | 5.130548 | 3.047466 | 3.935026 | 4.232492 | 3.052629 | 2.25852  | 2.484643 |
| 6.255132 | 5.904005 | 6.509279 | 6.70097  | 5.948824 | 6.071727 | 6.359459 | 4.918744 | 4.678725 |
| 5.475603 | 4.437611 | 5.118178 | 5.19654  | 5.453804 | 5.484837 | 5.212841 | 3.961991 | 3.245076 |
| 5.356045 | 5.646138 | 5.366026 | 5.562882 | 3.408949 | 5.867027 | 5.680945 | 4.076756 | 3.420449 |

|          |          |          |          |          |          |          |          |          |
|----------|----------|----------|----------|----------|----------|----------|----------|----------|
| 4.389414 | 3.78181  | 5.332897 | 4.41836  | 4.44099  | 3.92875  | 4.609156 | 3.503073 | 3.375004 |
| 7.764277 | 6.101544 | 5.570272 | 7.068954 | 4.590294 | 5.083842 | 6.43734  | 8.427495 | 7.395744 |
| 5.606004 | 6.554611 | 6.893127 | 5.371161 | 5.604627 | 7.353981 | 6.362012 | 4.527222 | 5.01532  |
| 3.486397 | 4.154029 | 5.125374 | 3.314937 | 4.037929 | 4.246378 | 2.915299 | 2.911113 | 2.554351 |
| 3.196186 | 3.007207 | 3.656478 | 3.177635 | 3.488497 | 3.784056 | 3.217847 | 3.796532 | 3.577837 |
| 5.349273 | 5.351859 | 5.223522 | 6.454848 | 5.694775 | 5.938253 | 7.354686 | 4.118643 | 4.468318 |
| 4.200808 | 3.077808 | 4.273301 | 4.558531 | 2.899703 | 4.588319 | 4.437048 | 2.789769 | 2.85373  |
| 4.908438 | 5.838213 | 4.496621 | 4.809696 | 5.702135 | 4.527774 | 4.20768  | 2.939218 | 3.471391 |
| 3.743371 | 3.500788 | 4.383519 | 4.942307 | 3.573992 | 4.314309 | 3.987381 | 2.347663 | 2.495536 |
| 4.221987 | 4.539835 | 3.5842   | 2.614609 | 2.168146 | 2.667057 | 4.130532 | 1.88321  | 1.739394 |
| 7.126568 | 7.585862 | 8.050308 | 7.837312 | 8.186154 | 7.897505 | 7.073064 | 6.660513 | 6.152814 |
| 3.665897 | 3.899641 | 4.13301  | 4.485802 | 4.209715 | 3.68706  | 4.401281 | 3.186684 | 2.329435 |
| 3.04098  | 3.414804 | 2.447186 | 4.752486 | 2.20123  | 3.826332 | 3.015501 | 5.996596 | 5.881791 |
| 5.400145 | 4.450858 | 4.740315 | 5.088125 | 3.318659 | 3.305072 | 3.681473 | 5.114816 | 5.666951 |
| 5.648911 | 4.199525 | 5.062672 | 4.560244 | 3.590568 | 4.293429 | 4.525725 | 5.930491 | 5.50024  |
| 2.145845 | 3.12014  | 3.01579  | 2.744261 | 2.06235  | 3.214202 | 2.00007  | 4.359428 | 4.79639  |
| 2.511761 | 3.819887 | 3.829264 | 2.571241 | 4.474404 | 3.685724 | 2.990222 | 1.840908 | 2.10668  |
| 6.263688 | 6.359841 | 6.425327 | 6.333792 | 4.528942 | 5.661457 | 5.659473 | 4.544562 | 5.189522 |
| 2.627903 | 3.003282 | 3.009958 | 2.855278 | 1.674547 | 2.355005 | 2.334797 | 4.648929 | 3.997215 |
| 5.04554  | 4.949437 | 6.4057   | 4.617954 | 4.543333 | 5.679867 | 4.540691 | 2.941955 | 3.423465 |
| 3.912694 | 5.618197 | 4.56908  | 4.461379 | 5.20279  | 4.313397 | 5.18927  | 4.009621 | 2.906064 |
| 4.212948 | 5.432739 | 5.80562  | 4.667627 | 5.316351 | 5.441783 | 6.174279 | 3.046317 | 4.910344 |
| 2.003012 | 3.473915 | 3.228297 | 4.053071 | 3.451079 | 2.856366 | 2.674866 | 1.65245  | 2.432716 |
| 6.157595 | 5.391571 | 6.173124 | 4.899308 | 4.537226 | 4.875095 | 5.798386 | 6.533    | 7.095718 |
| 3.478364 | 3.62772  | 3.119042 | 3.411351 | 4.5801   | 4.230225 | 3.664472 | 4.641143 | 3.81242  |
| 4.537137 | 4.292965 | 3.514335 | 4.505056 | 4.882789 | 4.827896 | 4.770728 | 2.527752 | 2.540655 |
| 4.124942 | 4.749132 | 4.52813  | 2.608845 | 2.948924 | 3.517134 | 3.17161  | 5.35515  | 4.964141 |
| 6.194809 | 4.69074  | 5.660188 | 4.723345 | 5.004983 | 4.621665 | 5.017463 | 5.983661 | 6.5776   |

8.152751 6.809246 6.773634 7.608995 5.944276 6.249314 6.72487 5.020707 5.437967



| Stob_12a_I | Stob_9c_H | Stob_10c_I | Stob_11c_I | Stob_4e_H | Stob_7e_H | Stob_15e_I | pValue   | qValue   |
|------------|-----------|------------|------------|-----------|-----------|------------|----------|----------|
| 4.299954   | 4.54746   | 5.31442    | 4.75582    | 3.609722  | 4.894402  | 5.247635   | 0.002131 | 0.038782 |
| 1.663616   | 2.277265  | 2.117181   | 2.029657   | 1.826567  | 2.33038   | 2.810859   | 0.003589 | 0.047393 |
| 4.490076   | 4.187989  | 4.228402   | 4.687644   | 4.474645  | 5.695018  | 4.912423   | 0.003327 | 0.047129 |
| 4.830482   | 3.606325  | 4.295127   | 4.509626   | 3.665699  | 3.798852  | 4.26796    | 0.003669 | 0.047393 |
| 4.886819   | 3.612244  | 4.799746   | 4.587767   | 3.730991  | 5.95327   | 4.774327   | 0.001983 | 0.038782 |
| 2.170352   | 2.385371  | 2.381717   | 2.381717   | 2.665044  | 2.728673  | 2.522608   | 0.000706 | 0.02481  |
| 5.23459    | 3.971953  | 5.220786   | 4.554981   | 4.539422  | 3.235036  | 5.39207    | 0.003918 | 0.049027 |
| 3.326929   | 3.887778  | 5.583806   | 4.60354    | 4.363989  | 3.0236    | 5.336941   | 0.002896 | 0.046229 |
| 3.3343     | 3.777106  | 3.27803    | 3.146691   | 3.271947  | 3.252413  | 4.048985   | 4.78E-09 | 4.87E-06 |
| 3.734201   | 4.112397  | 2.646518   | 2.556704   | 2.712442  | 2.517797  | 3.062661   | 0.001877 | 0.038782 |
| 3.551305   | 4.599506  | 3.466496   | 2.914788   | 3.441174  | 4.938085  | 4.082912   | 0.001654 | 0.038782 |
| 4.746715   | 3.732565  | 3.539751   | 4.048469   | 2.96403   | 3.815157  | 4.039399   | 0.000322 | 0.018439 |
| 2.327411   | 2.02717   | 2.344392   | 2.009781   | 1.785409  | 2.475181  | 2.927904   | 0.000243 | 0.018439 |
| 4.018259   | 3.448713  | 3.68478    | 4.580244   | 3.135269  | 3.267591  | 3.407176   | 0.001204 | 0.032299 |
| 4.033554   | 2.816095  | 4.767692   | 3.37822    | 2.598425  | 3.224361  | 3.86872    | 0.000312 | 0.018439 |
| 1.441626   | 1.772681  | 1.822181   | 2.302185   | 2.435251  | 1.947622  | 3.048946   | 0.003945 | 0.049027 |
| 2.258249   | 2.131687  | 2.022945   | 1.503908   | 1.755826  | 2.069957  | 2.751636   | 0.002031 | 0.038782 |
| 4.331185   | 5.673082  | 4.570356   | 5.288268   | 3.553923  | 4.233345  | 5.860641   | 0.000928 | 0.029547 |
| 4.473098   | 4.905626  | 4.531125   | 4.533522   | 3.985617  | 4.509542  | 3.680697   | 0.001755 | 0.038782 |
| 3.407344   | 4.716346  | 4.724292   | 4.358246   | 3.716     | 6.30721   | 5.706938   | 0.003692 | 0.047393 |
| 3.44938    | 4.452753  | 3.340377   | 2.868511   | 3.473915  | 4.866937  | 4.219642   | 0.000338 | 0.018439 |
| 2.925327   | 3.899039  | 3.294339   | 4.047526   | 4.203825  | 3.126588  | 3.508532   | 5.77E-05 | 0.011083 |
| 3.703287   | 4.195903  | 3.605376   | 3.866107   | 4.617377  | 4.734874  | 4.72161    | 0.000577 | 0.023809 |
| 3.335105   | 2.488206  | 3.212677   | 4.073074   | 3.26588   | 2.933132  | 2.73497    | 0.001075 | 0.031748 |
| 4.713545   | 5.01401   | 4.874598   | 4.609114   | 4.054945  | 3.783767  | 5.071344   | 0.001041 | 0.031748 |
| 7.550644   | 8.808434  | 8.357505   | 8.137992   | 7.783866  | 8.493977  | 9.556467   | 0.003299 | 0.047129 |

|          |          |          |          |          |          |          |          |          |
|----------|----------|----------|----------|----------|----------|----------|----------|----------|
| 1.970073 | 2.792436 | 1.976114 | 1.797197 | 2.103134 | 2.046891 | 1.903833 | 7.90E-05 | 0.011083 |
| 2.178509 | 2.947281 | 2.254727 | 2.446726 | 2.230194 | 2.371647 | 2.528225 | 0.002051 | 0.038782 |
| 3.597338 | 2.688762 | 3.945978 | 3.524206 | 3.028862 | 2.992915 | 2.296455 | 0.002367 | 0.041586 |
| 2.311248 | 3.407614 | 2.608656 | 2.503508 | 1.740083 | 2.36075  | 2.256691 | 0.002595 | 0.044466 |
| 5.319775 | 4.328088 | 3.743835 | 5.288268 | 5.304029 | 4.625837 | 5.456237 | 0.002072 | 0.038782 |
| 3.778692 | 3.572588 | 3.889202 | 3.007344 | 3.203122 | 4.681521 | 4.494789 | 0.001153 | 0.031748 |
| 4.955276 | 3.807843 | 3.356009 | 3.931954 | 4.192274 | 4.065564 | 3.795781 | 0.000682 | 0.02481  |
| 4.110078 | 3.762259 | 4.487241 | 4.925136 | 4.626269 | 3.39302  | 3.988657 | 0.000202 | 0.017112 |
| 4.839692 | 3.876119 | 4.87893  | 4.452639 | 5.034068 | 4.996954 | 4.726071 | 0.000103 | 0.011083 |
| 6.296364 | 6.259821 | 6.282956 | 5.414348 | 6.047476 | 4.758972 | 6.145611 | 0.003213 | 0.047129 |
| 6.318055 | 5.897808 | 6.679394 | 5.693068 | 7.360333 | 6.196167 | 6.424765 | 0.000521 | 0.023095 |
| 4.592105 | 3.301812 | 4.793224 | 4.333117 | 3.383481 | 4.44246  | 3.464602 | 0.002693 | 0.044466 |
| 2.506633 | 2.928095 | 2.171911 | 2.086681 | 3.781775 | 3.813262 | 3.042586 | 0.001965 | 0.038782 |
| 2.510167 | 2.906738 | 3.138146 | 2.495804 | 2.44333  | 4.037696 | 3.751    | 0.001862 | 0.038782 |
| 3.824935 | 4.465933 | 5.368947 | 3.978788 | 3.594411 | 4.359859 | 4.127087 | 0.000909 | 0.029547 |
| 3.075305 | 2.973215 | 2.795821 | 3.01585  | 2.784999 | 4.166932 | 4.001046 | 0.000362 | 0.018439 |
| 3.523354 | 5.373968 | 4.53738  | 3.001882 | 5.071593 | 4.286121 | 6.247001 | 0.000652 | 0.024592 |
| 2.236891 | 1.99988  | 2.636593 | 2.518887 | 2.142951 | 2.976976 | 3.422368 | 0.00185  | 0.038782 |
| 4.075755 | 5.297904 | 4.33733  | 3.321659 | 3.405748 | 3.655022 | 3.357914 | 5.59E-05 | 0.011083 |
| 4.41292  | 4.144466 | 3.263279 | 3.079612 | 4.41842  | 1.854928 | 4.440551 | 0.00358  | 0.047393 |
| 2.834068 | 3.007761 | 2.70798  | 2.806866 | 2.53022  | 2.731643 | 3.66314  | 0.000353 | 0.018439 |
| 3.886671 | 4.39746  | 4.479886 | 4.672562 | 4.060054 | 5.394856 | 5.410372 | 0.003721 | 0.047393 |
| 2.875069 | 2.553946 | 3.255132 | 3.498489 | 3.127968 | 3.275952 | 3.077819 | 0.000109 | 0.011083 |
| 4.58129  | 3.49119  | 3.430342 | 3.441204 | 3.345073 | 4.02334  | 3.630638 | 0.001727 | 0.038782 |
| 2.440285 | 2.613215 | 3.517338 | 2.721657 | 2.88029  | 2.614586 | 3.357668 | 9.13E-05 | 0.011083 |
| 4.468289 | 5.455998 | 5.968469 | 5.056919 | 4.517919 | 5.509074 | 6.345628 | 0.002705 | 0.044466 |
| 3.549908 | 4.593868 | 4.027079 | 4.519558 | 5.367966 | 4.253605 | 4.411616 | 0.000346 | 0.018439 |
| 3.672089 | 5.53816  | 3.945748 | 4.847522 | 3.182674 | 3.99538  | 4.550195 | 0.002632 | 0.044466 |

|          |          |          |          |          |          |          |          |          |
|----------|----------|----------|----------|----------|----------|----------|----------|----------|
| 3.065119 | 3.025689 | 3.791738 | 4.27944  | 3.293423 | 3.941204 | 3.17987  | 0.00145  | 0.037881 |
| 7.650719 | 8.27771  | 7.605398 | 7.293428 | 6.724635 | 6.856532 | 6.135278 | 0.003088 | 0.046972 |
| 5.067037 | 5.841453 | 5.310446 | 5.45904  | 5.357167 | 6.123792 | 6.528377 | 0.00333  | 0.047129 |
| 3.449215 | 2.609199 | 2.237146 | 2.623747 | 3.591631 | 2.564537 | 4.13058  | 0.003646 | 0.047393 |
| 4.281237 | 4.213133 | 4.179932 | 4.230502 | 3.706637 | 4.890557 | 4.792874 | 0.000584 | 0.023809 |
| 5.067807 | 4.792822 | 5.794899 | 5.948708 | 5.1303   | 5.858717 | 4.848488 | 0.001777 | 0.038782 |
| 2.137978 | 2.589921 | 3.27528  | 3.968303 | 3.825998 | 2.748647 | 3.34185  | 0.003069 | 0.046972 |
| 4.539417 | 3.170892 | 3.868963 | 3.846588 | 3.48353  | 4.676445 | 4.717329 | 0.00291  | 0.046229 |
| 2.710918 | 2.663164 | 2.852923 | 3.293189 | 2.528937 | 2.372598 | 2.874597 | 1.41E-07 | 7.18E-05 |
| 3.44938  | 1.941067 | 2.166751 | 2.789244 | 2.364248 | 2.728673 | 2.905207 | 0.00327  | 0.047129 |
| 6.447405 | 7.015607 | 6.261301 | 6.41279  | 7.182043 | 7.120108 | 7.815206 | 0.000469 | 0.021721 |
| 3.418183 | 3.04708  | 3.677924 | 3.141103 | 3.8929   | 2.385703 | 4.069874 | 0.001705 | 0.038782 |
| 3.857964 | 5.229589 | 5.549508 | 3.408776 | 5.10534  | 6.008133 | 6.200568 | 9.57E-05 | 0.011083 |
| 5.267533 | 5.969597 | 5.471467 | 4.810625 | 4.450023 | 5.57706  | 4.979074 | 0.000395 | 0.019184 |
| 6.498978 | 5.76813  | 5.380922 | 5.629272 | 4.636545 | 5.217408 | 5.535186 | 0.00029  | 0.018439 |
| 3.971171 | 3.782602 | 2.601273 | 2.868511 | 3.229592 | 3.607573 | 3.453072 | 0.001858 | 0.038782 |
| 2.926992 | 2.183338 | 2.588327 | 2.401332 | 3.089783 | 3.062856 | 2.281624 | 0.002949 | 0.046229 |
| 4.668066 | 5.105224 | 5.631062 | 5.891551 | 5.264019 | 4.962728 | 5.445893 | 0.000848 | 0.028814 |
| 3.376103 | 4.399314 | 5.033025 | 4.01652  | 2.74126  | 3.605698 | 3.358156 | 0.002365 | 0.041586 |
| 4.189812 | 3.435716 | 4.229646 | 3.723917 | 3.066362 | 4.713101 | 4.988163 | 0.001135 | 0.031748 |
| 4.735252 | 3.107377 | 4.117871 | 3.556076 | 4.074793 | 3.817339 | 4.6681   | 0.00357  | 0.047393 |
| 5.045851 | 4.073665 | 3.996964 | 5.192179 | 4.311304 | 3.955896 | 4.443269 | 0.003593 | 0.047393 |
| 2.170352 | 1.682678 | 1.662443 | 1.876805 | 1.880315 | 1.854928 | 2.905207 | 0.000197 | 0.017112 |
| 5.656162 | 6.631941 | 7.516193 | 6.599055 | 5.313535 | 6.261014 | 6.216807 | 0.002103 | 0.038782 |
| 4.497674 | 4.217337 | 4.343713 | 4.608304 | 4.568287 | 4.050586 | 5.197471 | 0.001496 | 0.038114 |
| 3.44938  | 3.782602 | 2.381717 | 3.225445 | 3.392072 | 2.728673 | 2.594638 | 4.04E-05 | 0.011083 |
| 5.16324  | 5.719735 | 5.148194 | 3.166462 | 3.501269 | 4.777057 | 4.795206 | 0.00404  | 0.049602 |
| 5.309144 | 7.178554 | 6.726482 | 5.804805 | 5.577756 | 6.263011 | 6.29765  | 0.000635 | 0.024592 |

5.260379 5.660525 4.823267 5.428987 6.554284 6.054793 5.912025 0.001106 0.031748

## Supplemental file 2

| Gene Name       | Ensembl ID      | Stob_4b_H | Stob_7b_H | Stob_11b_ | Stob_15b_ | Stob_5b_H |
|-----------------|-----------------|-----------|-----------|-----------|-----------|-----------|
| SKAP2           | ENSG00000005020 | 5.656422  | 6.620346  | 7.417006  | 6.587362  | 7.003839  |
| ODZ1            | ENSG00000009694 | 3.898114  | 5.082641  | 5.000266  | 5.410931  | 4.454259  |
| No Know Protein | ENSG00000010072 | 3.724306  | 5.124585  | 5.485728  | 4.418491  | 5.339903  |
| DYRK4           | ENSG00000010219 | 5.773549  | 6.518142  | 6.276362  | 6.097714  | 6.049651  |
| CPS1            | ENSG00000021826 | 5.005619  | 4.874712  | 5.727527  | 4.80442   | 5.386581  |
| LSG1            | ENSG00000041802 | 4.128747  | 5.201167  | 4.092615  | 3.145371  | 5.984675  |
| TDP1            | ENSG00000042088 | 4.654347  | 5.091598  | 4.248439  | 4.828263  | 4.730941  |
| No Know Protein | ENSG00000053438 | 8.751137  | 9.782485  | 7.868191  | 9.372171  | 8.815805  |
| GALC            | ENSG00000054983 | 3.03264   | 4.255952  | 5.255607  | 3.137844  | 3.879792  |
| No Know Protein | ENSG00000062716 | 3.025678  | 3.878859  | 4.353672  | 4.177864  | 4.525424  |
| DMRT3           | ENSG00000064218 | 5.282354  | 5.023144  | 5.744242  | 6.103387  | 5.697978  |
| FGF10           | ENSG00000070193 | 4.055231  | 5.519159  | 5.923353  | 5.527115  | 3.837053  |
| OSBPL3          | ENSG00000070882 | 2.706457  | 5.097132  | 4.758805  | 5.378922  | 3.642925  |
| TRHDE           | ENSG00000072657 | 5.353002  | 6.016119  | 6.486069  | 5.694402  | 6.502914  |
| CTTNBP2         | ENSG00000077063 | 4.982785  | 6.216702  | 6.293237  | 6.288236  | 6.309364  |
| AMPH            | ENSG00000078053 | 3.215422  | 3.31697   | 2.548343  | 3.753624  | 4.03976   |
| FAP             | ENSG00000078098 | 2.931311  | 4.256309  | 4.029607  | 4.22114   | 4.252448  |
| TNS1            | ENSG00000079308 | 4.868423  | 5.084712  | 5.440988  | 5.467643  | 6.033583  |
| MAGI3           | ENSG00000081026 | 4.34026   | 6.178559  | 6.144229  | 6.122447  | 5.631074  |
| COL19A1         | ENSG00000082293 | 4.36335   | 3.346764  | 2.677367  | 2.814959  | 4.435949  |
| TMEM40          | ENSG00000088726 | 1.724329  | 2.774476  | 1.604296  | 3.659002  | 3.869185  |
| SIGLEC1         | ENSG00000088827 | 3.281971  | 5.561118  | 5.24962   | 5.974177  | 5.364232  |
| MRPS33          | ENSG00000090263 | 2.620857  | 5.926302  | 5.522259  | 5.16821   | 5.41293   |
| CD209           | ENSG00000090659 | 4.023268  | 5.485682  | 5.46472   | 5.615611  | 5.664465  |
| No Know Protein | ENSG00000100418 | 4.781427  | 4.784633  | 4.920088  | 4.270032  | 4.716869  |
| C14orf145       | ENSG00000100629 | 2.739739  | 4.01469   | 5.003091  | 3.433114  | 3.190205  |
| PAPLN           | ENSG00000100767 | 5.355509  | 5.517532  | 5.051537  | 5.210062  | 4.126614  |
| RNF24           | ENSG00000101236 | 7.353314  | 8.414352  | 6.923747  | 7.58739   | 6.607611  |
| RNF125          | ENSG00000101695 | 4.355199  | 5.53343   | 6.043853  | 5.018366  | 5.573414  |
| GPR143          | ENSG00000101850 | 2.429549  | 2.608828  | 1.775492  | 2.354818  | 2.395822  |
| SRPX            | ENSG00000101955 | 5.170788  | 6.392725  | 6.067709  | 6.063479  | 6.530759  |
| ASB9            | ENSG00000102048 | 4.058281  | 3.24679   | 3.490402  | 3.817845  | 3.821626  |
| CCDC113         | ENSG00000103021 | 4.897037  | 4.700487  | 4.894987  | 4.581313  | 5.460836  |
| No Know Protein | ENSG00000103042 | 3.262457  | 4.779692  | 4.734001  | 4.727945  | 3.519532  |
| MON1B           | ENSG00000103111 | 4.528998  | 5.707273  | 5.633808  | 4.914608  | 5.686947  |
| No Know Protein | ENSG00000103496 | 5.222686  | 6.909723  | 7.088628  | 6.424591  | 6.345458  |
| MTFMT           | ENSG00000103707 | 3.877735  | 4.03406   | 4.816854  | 2.720084  | 3.075809  |
| No Know Protein | ENSG00000104447 | 5.071537  | 5.0163    | 4.806207  | 5.329359  | 5.321138  |
| CCDC94          | ENSG00000105248 | 5.599516  | 4.702284  | 4.367075  | 4.569442  | 4.586326  |
| No Know Protein | ENSG00000105329 | 4.934675  | 7.324711  | 6.630136  | 6.345052  | 6.665045  |
| No Know Protein | ENSG00000105792 | 2.067146  | 3.385923  | 3.608909  | 3.409832  | 3.589662  |
| HOXA3           | ENSG00000105997 | 5.204481  | 5.921738  | 6.696495  | 6.387879  | 6.133633  |
| URG4            | ENSG00000106608 | 5.678364  | 6.918079  | 6.715492  | 6.20817   | 6.757029  |
| No Know Protein | ENSG00000107282 | 5.552477  | 5.685756  | 4.975841  | 4.496249  | 5.522755  |
| CUBN            | ENSG00000107611 | 3.859548  | 4.290558  | 4.736698  | 4.510961  | 4.475081  |

|                 |                 |          |          |          |          |          |
|-----------------|-----------------|----------|----------|----------|----------|----------|
| No Know Protein | ENSG00000109332 | 5.330109 | 5.038464 | 3.960001 | 5.13508  | 4.939938 |
| No Know Protein | ENSG00000109610 | 7.073256 | 7.84927  | 7.403777 | 7.419077 | 7.97187  |
| PPARGC1A        | ENSG00000109819 | 3.424305 | 2.774476 | 5.194332 | 3.442978 | 4.532386 |
| No Know Protein | ENSG00000112812 | 3.156751 | 4.85251  | 3.309977 | 4.479434 | 2.264607 |
| No Know Protein | ENSG00000112936 | 4.346079 | 6.040133 | 5.310389 | 6.970751 | 6.351253 |
| GNPDA1          | ENSG00000113552 | 4.236908 | 5.518604 | 6.206971 | 5.288387 | 5.49723  |
| BNIP1           | ENSG00000113734 | 3.743168 | 3.668798 | 5.169985 | 3.344324 | 3.673424 |
| CNTN3           | ENSG00000113805 | 2.899219 | 5.169943 | 5.167397 | 4.340148 | 4.528229 |
| IFT57           | ENSG00000114446 | 2.509944 | 4.78818  | 4.873536 | 4.058346 | 4.012241 |
| MORC1           | ENSG00000114487 | 3.945362 | 3.302707 | 2.877416 | 2.498904 | 4.365914 |
| LOC729843       | ENSG00000115274 | 4.164651 | 3.803091 | 3.768946 | 3.511329 | 5.009787 |
| DHCR24          | ENSG00000116133 | 7.355493 | 7.478421 | 8.277643 | 8.02057  | 8.346904 |
| ANGPTL1         | ENSG00000116194 | 5.078245 | 6.423771 | 6.392565 | 5.662876 | 6.135611 |
| No Know Protein | ENSG00000116641 | 4.024306 | 3.173315 | 4.339683 | 4.15338  | 5.201167 |
| No Know Protein | ENSG00000116701 | 3.91493  | 5.56613  | 5.769556 | 5.595985 | 6.104378 |
| No Know Protein | ENSG00000116729 | 3.420824 | 4.366533 | 5.526149 | 4.437177 | 4.115019 |
| RARRES1         | ENSG00000118849 | 3.682428 | 5.84285  | 5.898292 | 5.435224 | 5.740162 |
| PPL             | ENSG00000118898 | 4.992126 | 6.362298 | 5.594996 | 4.960796 | 5.836788 |
| No Know Protein | ENSG00000118990 | 6.647784 | 6.370277 | 6.127672 | 6.343931 | 7.04993  |
| KIAA1622        | ENSG00000119698 | 4.442072 | 3.157919 | 3.548712 | 4.194036 | 3.361733 |
| UTP20           | ENSG00000120800 | 3.302055 | 5.147796 | 4.275368 | 2.250773 | 3.306113 |
| TBX4            | ENSG00000121075 | 5.594662 | 5.357722 | 4.937508 | 3.956663 | 5.245739 |
| PDZRN3          | ENSG00000121440 | 6.165821 | 7.237764 | 7.659591 | 7.650877 | 6.583017 |
| CPXM2           | ENSG00000121898 | 4.51159  | 5.496933 | 5.797349 | 6.016034 | 5.281007 |
| No Know Protein | ENSG00000122121 | 4.595942 | 5.59377  | 3.685379 | 5.822271 | 5.941151 |
| LY9             | ENSG00000122224 | 4.024306 | 4.645595 | 4.614728 | 4.948935 | 5.95212  |
| No Know Protein | ENSG00000122335 | 4.177238 | 5.371764 | 5.624293 | 4.771195 | 5.543315 |
| No Know Protein | ENSG00000122592 | 4.957844 | 6.250304 | 6.081443 | 5.529816 | 6.264323 |
| CALD1           | ENSG00000122786 | 3.150175 | 2.847514 | 4.285627 | 3.613631 | 2.69957  |
| SARDH           | ENSG00000123453 | 4.248871 | 4.096823 | 3.750848 | 4.725148 | 5.260054 |
| PFKFB2          | ENSG00000123836 | 3.224657 | 5.597851 | 5.000782 | 4.826956 | 4.355469 |
| No Know Protein | ENSG00000124496 | 2.977927 | 4.607904 | 4.794821 | 4.936083 | 5.210862 |
| No Know Protein | ENSG00000125875 | 5.039705 | 6.238609 | 6.443379 | 5.756753 | 5.665342 |
| C12orf26        | ENSG00000127720 | 4.324023 | 4.563121 | 5.194332 | 3.145371 | 4.622101 |
| No Know Protein | ENSG00000129151 | 4.780688 | 5.431407 | 4.801865 | 4.11878  | 3.781561 |
| No Know Protein | ENSG00000130177 | 5.447686 | 6.826549 | 7.296648 | 6.750796 | 6.891366 |
| KIAA1683        | ENSG00000130518 | 5.531939 | 2.652447 | 3.489507 | 4.101917 | 3.762955 |
| No Know Protein | ENSG00000130713 | 5.220083 | 6.646162 | 6.990165 | 6.656755 | 7.434935 |
| GFPT2           | ENSG00000131459 | 4.870179 | 5.662612 | 4.883779 | 6.274046 | 5.224006 |
| MORC4           | ENSG00000133131 | 4.19232  | 5.509344 | 6.107382 | 5.867054 | 5.961477 |
| GIMAP4          | ENSG00000133574 | 4.478122 | 5.553664 | 6.131229 | 5.339458 | 5.755578 |
| RNF122          | ENSG00000133874 | 4.849995 | 5.02577  | 5.790585 | 4.852791 | 6.104503 |
| No Know Protein | ENSG00000133937 | 2.774519 | 4.094518 | 4.149111 | 3.142487 | 4.047967 |
| CNTN6           | ENSG00000134115 | 3.877731 | 4.286768 | 4.439651 | 6.125574 | 5.669673 |
| No Know Protein | ENSG00000135457 | 2.901253 | 3.173315 | 2.780212 | 3.788996 | 1.190902 |
| MIP             | ENSG00000135517 | 2.590113 | 2.708811 | 3.979807 | 3.551639 | 3.520395 |
| MICAL1          | ENSG00000135596 | 6.912454 | 5.779852 | 4.822748 | 5.209226 | 6.974781 |

|                 |                 |          |          |          |          |          |
|-----------------|-----------------|----------|----------|----------|----------|----------|
| SEMA4F          | ENSG00000135622 | 3.589768 | 4.20871  | 4.724576 | 4.755124 | 4.634169 |
| ARMC9           | ENSG00000135931 | 3.351223 | 4.865096 | 5.161631 | 4.96781  | 4.476257 |
| No Know Protein | ENSG00000136861 | 4.195423 | 4.469093 | 4.938016 | 4.116298 | 3.970246 |
| IL33            | ENSG00000137033 | 2.862354 | 4.386818 | 3.708018 | 4.395491 | 4.313174 |
| No Know Protein | ENSG00000137491 | 4.186128 | 5.408386 | 4.595092 | 4.477125 | 3.771536 |
| SULF1           | ENSG00000137573 | 5.038334 | 4.709369 | 5.796248 | 5.417418 | 5.384316 |
| SORL1           | ENSG00000137642 | 5.896664 | 6.105516 | 6.413893 | 5.576881 | 5.394102 |
| THBS1           | ENSG00000137801 | 7.260019 | 8.949266 | 7.854293 | 8.854719 | 8.996806 |
| CYP1B1          | ENSG00000138061 | 4.052308 | 6.261801 | 5.607774 | 5.554936 | 6.188778 |
| EMILIN1         | ENSG00000138080 | 5.091898 | 6.16804  | 5.115334 | 5.413059 | 5.218376 |
| ANKRD52         | ENSG00000139645 | 5.398878 | 5.429152 | 5.362421 | 5.264574 | 5.351219 |
| RB1             | ENSG00000139687 | 5.618012 | 7.297466 | 6.659759 | 5.7911   | 6.482938 |
| MFAP1           | ENSG00000140259 | 3.276758 | 4.430329 | 3.808792 | 3.446482 | 4.575414 |
| No Know Protein | ENSG00000140332 | 3.03003  | 5.67797  | 5.20821  | 4.182394 | 4.591436 |
| GATA6           | ENSG00000141448 | 4.948118 | 5.717887 | 6.006728 | 5.848889 | 5.166968 |
| No Know Protein | ENSG00000141456 | 5.376191 | 6.024647 | 6.267418 | 5.488165 | 6.065349 |
| No Know Protein | ENSG00000141503 | 4.948564 | 5.635301 | 6.137551 | 5.61237  | 4.585024 |
| No Know Protein | ENSG00000141748 | 4.553667 | 2.800459 | 3.176205 | 2.504076 | 3.455007 |
| TRPM2           | ENSG00000142185 | 4.693943 | 6.066463 | 5.555396 | 5.531912 | 4.910229 |
| CREG1           | ENSG00000143162 | 5.698042 | 3.432823 | 3.572198 | 3.727875 | 2.535283 |
| DYRK3           | ENSG00000143479 | 5.186207 | 4.188406 | 5.812538 | 5.271428 | 5.535055 |
| No Know Protein | ENSG00000143627 | 3.540306 | 2.505231 | 3.335627 | 3.198317 | 3.2797   |
| No Know Protein | ENSG00000143933 | 4.580588 | 4.563121 | 5.415852 | 5.744393 | 6.002387 |
| ETAA1           | ENSG00000143971 | 2.491376 | 3.762361 | 4.289159 | 3.651555 | 4.045252 |
| No Know Protein | ENSG00000145191 | 4.47056  | 5.55532  | 5.468978 | 5.250185 | 5.077042 |
| CXCL14          | ENSG00000145824 | 7.979296 | 9.133752 | 8.552584 | 8.31444  | 9.112811 |
| DAAM2           | ENSG00000146122 | 4.478976 | 5.978249 | 5.633224 | 5.073904 | 5.654853 |
| CYP39A1         | ENSG00000146233 | 3.424305 | 4.915512 | 5.386243 | 4.787753 | 6.080009 |
| RSPO3           | ENSG00000146374 | 4.788118 | 5.418074 | 6.742166 | 5.958121 | 6.550575 |
| ANKRD30A        | ENSG00000148513 | 3.078445 | 4.390151 | 4.070144 | 3.241666 | 2.170257 |
| PPRC1           | ENSG00000148840 | 5.21896  | 5.553664 | 5.383648 | 5.20152  | 6.563608 |
| ANK3            | ENSG00000151150 | 4.0255   | 4.486715 | 5.789269 | 5.311709 | 5.837446 |
| ZIC1            | ENSG00000152977 | 3.581853 | 3.705108 | 3.074788 | 3.843604 | 4.035469 |
| APCDD1          | ENSG00000154856 | 7.385657 | 6.952602 | 7.678501 | 7.567243 | 7.081695 |
| DKK2            | ENSG00000155011 | 5.56867  | 5.835826 | 5.675435 | 6.718995 | 6.637508 |
| SPAG17          | ENSG00000155761 | 3.387781 | 5.122776 | 4.084725 | 4.532642 | 3.608529 |
| AFF2            | ENSG00000155966 | 5.722988 | 6.560443 | 6.053251 | 6.289889 | 6.725494 |
| TSPAN7          | ENSG00000156298 | 1.872085 | 4.906681 | 4.920088 | 4.978638 | 5.059319 |
| No Know Protein | ENSG00000157680 | 3.006839 | 3.893689 | 4.957555 | 4.800914 | 4.706641 |
| ZSCAN12         | ENSG00000158691 | 3.644443 | 4.471604 | 5.262178 | 4.372637 | 4.574279 |
| C1orf51         | ENSG00000159208 | 4.498975 | 3.528607 | 4.600984 | 3.560458 | 4.261209 |
| HLCS            | ENSG00000159267 | 2.456077 | 3.627185 | 3.915429 | 3.349657 | 3.820286 |
| SCUBE1          | ENSG00000159307 | 4.935856 | 4.888541 | 5.127619 | 4.306535 | 5.3701   |
| TFF1            | ENSG00000160182 | 3.540041 | 3.50953  | 3.832293 | 4.300851 | 3.981452 |
| CCDC116         | ENSG00000161180 | 5.521665 | 4.505802 | 3.499335 | 4.745685 | 3.708037 |
| PLXDC1          | ENSG00000161381 | 5.650902 | 6.112313 | 4.710617 | 5.737892 | 5.241981 |
| CCNF            | ENSG00000162063 | 6.024032 | 4.812706 | 5.266862 | 4.806613 | 5.248335 |

|                 |                 |          |          |          |          |          |
|-----------------|-----------------|----------|----------|----------|----------|----------|
| ACOT11          | ENSG00000162390 | 6.747976 | 5.035014 | 5.731519 | 5.863578 | 5.162604 |
| ZSWIM5          | ENSG00000162415 | 1.562301 | 2.072173 | 2.516871 | 1.86207  | 2.264607 |
| CADM3           | ENSG00000162706 | 4.96582  | 5.888397 | 4.270003 | 5.196656 | 5.970971 |
| SPATA18         | ENSG00000163071 | 3.905449 | 4.664053 | 4.490091 | 5.158492 | 5.238829 |
| GLB1L           | ENSG00000163521 | 5.342772 | 5.459594 | 5.882794 | 5.848015 | 5.692888 |
| SERPINI1        | ENSG00000163536 | 2.933558 | 3.307513 | 5.255778 | 2.978448 | 3.718437 |
| LRRC2           | ENSG00000163827 | 3.670352 | 2.537942 | 4.401395 | 2.694144 | 3.719236 |
| GRIK3           | ENSG00000163873 | 4.658435 | 2.445548 | 2.161496 | 2.328184 | 3.015664 |
| UBXD7           | ENSG00000163960 | 5.247857 | 4.648766 | 6.029608 | 4.777025 | 5.668871 |
| No Know Protein | ENSG00000164031 | 1.804428 | 3.432823 | 3.950879 | 2.250773 | 2.844372 |
| HHIP            | ENSG00000164161 | 4.33588  | 5.618459 | 4.575385 | 5.118602 | 5.276812 |
| EGFLAM          | ENSG00000164318 | 4.939485 | 5.880664 | 6.507109 | 4.581897 | 5.5074   |
| No Know Protein | ENSG00000164627 | 5.441992 | 1.87422  | 4.149111 | 4.479434 | 6.109832 |
| ALDH1A1         | ENSG00000165092 | 6.940479 | 8.406564 | 8.786368 | 8.333127 | 8.380855 |
| No Know Protein | ENSG00000166145 | 5.441992 | 2.522608 | 3.72871  | 4.15338  | 2.989634 |
| SAAL1           | ENSG00000166788 | 2.660269 | 4.326853 | 4.062982 | 3.717021 | 3.430157 |
| NKX3-1          | ENSG00000167034 | 4.797657 | 4.065502 | 4.058081 | 4.566926 | 3.499657 |
| PBX3            | ENSG00000167081 | 3.852012 | 4.593297 | 5.267341 | 4.891526 | 5.296586 |
| SCARA3          | ENSG00000168077 | 5.210736 | 6.303869 | 5.051388 | 6.843088 | 5.889272 |
| DDIT4           | ENSG00000168209 | 8.212843 | 8.531643 | 8.279269 | 7.69914  | 8.032882 |
| XIRP1           | ENSG00000168334 | 2.465198 | 1.522951 | 2.08695  | 2.107251 | 2.668975 |
| AXIN2           | ENSG00000168646 | 5.936536 | 6.823981 | 7.003083 | 6.768852 | 6.49563  |
| No Know Protein | ENSG00000168702 | 4.000686 | 4.405071 | 5.21811  | 3.26428  | 4.74351  |
| TCTN2           | ENSG00000168778 | 3.44254  | 4.370001 | 4.030297 | 3.789015 | 4.005647 |
| ANTXR1          | ENSG00000169604 | 2.936843 | 5.140879 | 4.758184 | 4.870356 | 4.362798 |
| ROBO1           | ENSG00000169855 | 3.495442 | 4.235742 | 4.925812 | 4.796092 | 5.087221 |
| CDC42BPG        | ENSG00000171219 | 4.360195 | 2.964909 | 2.655297 | 3.17533  | 2.748239 |
| No Know Protein | ENSG00000171766 | 5.126389 | 6.284523 | 5.909901 | 5.908529 | 6.291916 |
| CTPS            | ENSG00000171793 | 4.223521 | 4.716755 | 2.516871 | 1.926295 | 3.145371 |
| MBOAT1          | ENSG00000172197 | 3.582807 | 5.002262 | 5.728232 | 5.296334 | 4.407296 |
| RCAN2           | ENSG00000172348 | 7.113263 | 7.582901 | 6.699197 | 6.830234 | 6.076117 |
| IL16            | ENSG00000172349 | 6.529946 | 7.150918 | 6.98719  | 7.243657 | 7.08106  |
| No Know Protein | ENSG00000172594 | 1.624455 | 3.511451 | 2.741509 | 2.663981 | 2.654223 |
| No Know Protein | ENSG00000172986 | 5.416002 | 5.966104 | 6.399368 | 6.204475 | 6.378764 |
| HPSE2           | ENSG00000172987 | 4.985301 | 4.265772 | 4.335295 | 3.847395 | 4.524394 |
| DMRT2           | ENSG00000173253 | 6.466781 | 6.111383 | 7.379789 | 5.413018 | 6.173051 |
| DDX23           | ENSG00000174243 | 5.984675 | 6.07583  | 6.006302 | 5.988136 | 5.562732 |
| No Know Protein | ENSG00000174348 | 5.260901 | 4.77486  | 4.437307 | 4.736279 | 4.38412  |
| MLXIP           | ENSG00000175727 | 4.932044 | 6.346082 | 6.304147 | 6.247705 | 6.246381 |
| PRIMA1          | ENSG00000175785 | 2.647523 | 4.55454  | 6.01356  | 5.306665 | 3.899835 |
| EDG5            | ENSG00000175898 | 3.729435 | 5.404571 | 3.924501 | 4.902445 | 5.527279 |
| RNF152          | ENSG00000176641 | 3.945484 | 3.766181 | 4.105765 | 2.701205 | 3.311235 |
| No Know Protein | ENSG00000177058 | 4.072795 | 4.845862 | 5.328928 | 4.76789  | 4.007977 |
| TOP3A           | ENSG00000177302 | 3.489646 | 4.83695  | 5.875421 | 5.083602 | 5.093905 |
| CD163L1         | ENSG00000177675 | 3.75652  | 4.911244 | 4.907507 | 4.976932 | 4.55098  |
| C10orf53        | ENSG00000178645 | 2.35459  | 2.233893 | 2.911659 | 2.47162  | 2.6019   |
| RCC2            | ENSG00000179051 | 4.043635 | 6.581044 | 6.071057 | 5.744458 | 5.982762 |



|                 |                 |          |          |          |          |          |
|-----------------|-----------------|----------|----------|----------|----------|----------|
| No Know Protein | ENSG00000179085 | 3.448537 | 2.716763 | 3.75103  | 3.174022 | 4.648062 |
| No Know Protein | ENSG00000179630 | 3.466278 | 3.902598 | 3.668546 | 2.378374 | 3.866331 |
| CRIPAK          | ENSG00000179979 | 4.745368 | 5.506945 | 5.834628 | 5.818946 | 4.977689 |
| ALX1            | ENSG00000180318 | 5.07589  | 4.893044 | 6.212241 | 5.56347  | 6.603515 |
| No Know Protein | ENSG00000180438 | 4.498282 | 3.173315 | 2.435251 | 3.06545  | 4.226749 |
| MAB21L1         | ENSG00000180660 | 3.386251 | 2.349472 | 3.21968  | 3.97704  | 3.929844 |
| No Know Protein | ENSG00000181458 | 4.289712 | 4.670418 | 5.512929 | 4.929538 | 5.168717 |
| SLC9A9          | ENSG00000181804 | 4.510356 | 6.358062 | 6.86738  | 6.981921 | 6.488981 |
| UNC5C           | ENSG00000182168 | 4.68049  | 5.155714 | 5.696886 | 6.080552 | 5.668891 |
| PAPPA           | ENSG00000182752 | 2.623609 | 3.758117 | 4.256694 | 4.773202 | 3.351618 |
| No Know Protein | ENSG00000183117 | 4.496878 | 4.61897  | 5.441198 | 4.384054 | 3.941706 |
| No Know Protein | ENSG00000183258 | 4.81192  | 4.784633 | 6.213479 | 5.656631 | 6.525611 |
| HIST1H1B        | ENSG00000184357 | 3.940653 | 4.233209 | 4.1561   | 3.943882 | 3.329829 |
| HIST2H2BE       | ENSG00000184678 | 3.334467 | 2.398799 | 3.659907 | 3.278054 | 4.084526 |
| ANKS1B          | ENSG00000185046 | 3.196148 | 2.982047 | 3.780684 | 4.213001 | 3.718229 |
| INTS5           | ENSG00000185085 | 4.129323 | 4.912389 | 4.9451   | 4.20633  | 5.443563 |
| No Know Protein | ENSG00000185652 | 3.652545 | 4.005589 | 1.68133  | 3.951305 | 2.014436 |
| No Know Protein | ENSG00000186567 | 4.899401 | 4.292593 | 4.477206 | 4.507533 | 4.990521 |
| TPCN1           | ENSG00000186815 | 5.848491 | 6.200153 | 6.208086 | 5.63694  | 6.389747 |
| TMPRSS6         | ENSG00000187045 | 3.107077 | 2.362632 | 4.418698 | 4.361765 | 1.741866 |
| No Know Protein | ENSG00000187164 | 4.943781 | 6.931489 | 6.448297 | 6.777699 | 5.951468 |
| HMX3            | ENSG00000188620 | 5.769985 | 4.500111 | 4.438797 | 5.369509 | 5.232661 |
| PRELP           | ENSG00000188783 | 9.603811 | 8.705554 | 9.018455 | 9.319337 | 8.793545 |
| LRRK2           | ENSG00000188906 | 3.828776 | 5.639598 | 6.131252 | 4.984573 | 5.193367 |
| PTPRT           | ENSG00000196090 | 4.101078 | 4.932328 | 4.298936 | 4.079171 | 4.384223 |
| No Know Protein | ENSG00000196154 | 4.267093 | 3.612486 | 2.232261 | 3.499288 | 3.336288 |
| SIRPB2          | ENSG00000196209 | 4.792967 | 3.840393 | 3.801646 | 3.706793 | 4.491439 |
| No Know Protein | ENSG00000196502 | 6.510397 | 7.608275 | 7.527376 | 7.687242 | 7.250136 |
| TRPV1           | ENSG00000196689 | 3.045373 | 4.279608 | 5.013668 | 5.262272 | 3.870432 |
| No Know Protein | ENSG00000196917 | 6.075516 | 6.632856 | 7.150102 | 6.95843  | 6.463993 |
| GPR123          | ENSG00000197177 | 4.932476 | 3.757947 | 3.477702 | 4.921584 | 5.407149 |
| OR8D2           | ENSG00000197263 | 5.57528  | 3.796627 | 5.603792 | 4.288337 | 4.295177 |
| SIPA1L1         | ENSG00000197555 | 2.801724 | 4.130003 | 5.489604 | 4.935729 | 5.806723 |
| KLHL14          | ENSG00000197705 | 2.301393 | 3.676932 | 3.226693 | 2.052484 | 1.909707 |
| CARD11          | ENSG00000198286 | 3.930105 | 2.389714 | 2.992843 | 3.984315 | 3.027687 |
| SPG3A           | ENSG00000198513 | 4.117888 | 5.425355 | 4.972337 | 4.709108 | 4.723708 |
| No Know Protein | ENSG00000198518 | 5.692121 | 6.161181 | 6.942914 | 5.753161 | 6.495145 |
| No Know Protein | ENSG00000200411 | 2.293504 | 2.295749 | 2.137799 | 2.616628 | 3.157443 |
| No Know Protein | ENSG00000201736 | 3.553684 | 2.861449 | 2.754315 | 2.657771 | 2.515289 |
| CR1             | ENSG00000203710 | 3.790406 | 5.837843 | 6.212967 | 5.777422 | 5.595671 |
| No Know Protein | ENSG00000204054 | 2.360436 | 4.065946 | 3.956678 | 2.568044 | 3.783088 |
| No Know Protein | ENSG00000205592 | 4.30464  | 3.564151 | 3.332636 | 3.58103  | 4.511472 |
| ITSN1           | ENSG00000205726 | 3.946941 | 4.867345 | 6.112727 | 5.192766 | 5.748928 |
| LOC729277       | ENSG00000213753 | 3.557283 | 3.562096 | 4.231544 | 4.757166 | 4.643252 |
| No Know Protein | ENSG00000213780 | 5.195033 | 6.635212 | 6.534248 | 6.754953 | 6.574165 |
| LOC391026       | ENSG00000214141 | 3.204723 | 2.406374 | 2.447494 | 2.112202 | 2.920698 |
| No Know Protein | ENSG00000214891 | 3.933948 | 2.731027 | 3.269525 | 2.874628 | 4.681506 |

|                 |                 |          |          |          |          |          |
|-----------------|-----------------|----------|----------|----------|----------|----------|
| No Know Protein | ENSG00000215043 | 2.686012 | 3.037866 | 3.626839 | 3.44304  | 2.774516 |
| No Know Protein | ENSG00000223452 | 5.109282 | 5.888871 | 6.026948 | 6.227426 | 5.293012 |
| No Know Protein | ENSG00000224512 | 6.464893 | 6.170686 | 5.532667 | 6.277498 | 6.112145 |
| No Know Protein | ENSG00000224940 | 4.927559 | 5.112702 | 5.420184 | 5.320872 | 4.827928 |
| No Know Protein | ENSG00000227593 | 2.772437 | 2.774476 | 4.031094 | 3.214202 | 4.786617 |
| No Know Protein | ENSG00000233746 | 5.470179 | 4.21461  | 4.519145 | 4.994426 | 4.829026 |
| No Know Protein | ENSG00000234491 | 4.778953 | 6.384708 | 4.920647 | 5.732444 | 5.881145 |
| No Know Protein | ENSG00000234918 | 3.300134 | 4.699866 | 3.532827 | 3.804956 | 2.891031 |
| No Know Protein | ENSG00000235462 | 2.800376 | 2.969967 | 2.318073 | 2.389258 | 3.253663 |
| No Know Protein | ENSG00000236762 | 3.907466 | 3.173315 | 1.736197 | 3.916253 | 4.113741 |
| No Know Protein | ENSG00000239646 | 6.700699 | 6.879954 | 7.29761  | 7.179639 | 7.511031 |
| No Know Protein | ENSG00000240058 | 3.490447 | 3.975504 | 2.704069 | 4.244603 | 3.766431 |
| No Know Protein | ENSG00000240800 | 4.070095 | 5.98888  | 4.954932 | 5.037558 | 3.30834  |
| No Know Protein | ENSG00000241286 | 4.947951 | 4.116439 | 4.47092  | 4.170903 | 5.009328 |
| No Know Protein | ENSG00000241385 | 5.155178 | 4.028562 | 4.278549 | 4.670572 | 5.494179 |

| Stob_6b_H | Stob_14b_ | Stob_16b_ | Stob_17b_ | Stob_4d_H | Stob_7d_H | Stob_15d_ | Stob_11f_ | Stob_9b_H |
|-----------|-----------|-----------|-----------|-----------|-----------|-----------|-----------|-----------|
| 6.903033  | 7.204695  | 6.781918  | 7.153233  | 6.97858   | 6.339022  | 5.942714  | 6.684541  | 5.132191  |
| 4.654246  | 5.569927  | 5.253635  | 5.506148  | 4.764028  | 3.967598  | 5.171508  | 4.706676  | 4.460257  |
| 4.581716  | 4.907566  | 4.653999  | 4.934464  | 5.0847    | 3.446549  | 4.458186  | 4.92424   | 4.185197  |
| 6.348144  | 6.52873   | 5.399075  | 6.402401  | 6.224951  | 6.432705  | 6.347942  | 6.589046  | 4.840696  |
| 5.396169  | 5.610654  | 4.738643  | 5.585966  | 5.242518  | 4.218774  | 4.458877  | 5.387023  | 4.232804  |
| 4.654495  | 4.383675  | 6.538441  | 3.718802  | 4.250239  | 5.769893  | 2.503491  | 4.444621  | 1.804428  |
| 5.221457  | 5.124315  | 4.614728  | 4.834526  | 5.095294  | 3.808113  | 5.554919  | 5.088971  | 4.911743  |
| 9.187762  | 8.43807   | 9.07748   | 9.296734  | 9.114273  | 8.799683  | 9.178837  | 8.473937  | 5.94504   |
| 4.665299  | 4.346862  | 4.92062   | 4.65508   | 2.807206  | 2.495876  | 3.213395  | 4.415572  | 2.747938  |
| 4.206381  | 4.777891  | 4.715699  | 4.506294  | 5.032321  | 3.451275  | 4.145602  | 3.837107  | 3.053093  |
| 5.588416  | 5.311555  | 5.407364  | 5.184255  | 5.25913   | 4.087008  | 6.223174  | 5.917546  | 3.70476   |
| 4.38867   | 4.146945  | 5.145763  | 5.359959  | 5.183856  | 4.591219  | 5.603403  | 5.416629  | 4.100748  |
| 5.086045  | 3.70091   | 4.897321  | 4.909649  | 3.429272  | 3.990373  | 4.524047  | 3.774019  | 3.39593   |
| 6.274305  | 6.82921   | 5.725676  | 6.164629  | 5.720685  | 4.568248  | 5.680116  | 6.541808  | 4.709298  |
| 6.361906  | 6.434576  | 5.323776  | 6.742836  | 6.144304  | 5.176628  | 5.582335  | 5.467033  | 4.825754  |
| 3.270235  | 3.733981  | 3.956189  | 5.455767  | 3.745765  | 2.656617  | 3.146485  | 2.14688   | 2.083058  |
| 2.545375  | 4.26846   | 3.057502  | 4.420174  | 3.936726  | 3.175111  | 3.232448  | 2.222336  | 2.955011  |
| 6.00937   | 5.156823  | 5.396841  | 5.76109   | 5.341465  | 5.61361   | 4.400483  | 5.730068  | 3.118555  |
| 5.963947  | 6.066376  | 6.149669  | 6.200131  | 5.627618  | 5.495782  | 5.802648  | 6.218545  | 5.162894  |
| 3.450918  | 2.730247  | 2.837023  | 2.808886  | 2.335175  | 3.357634  | 3.757034  | 3.066253  | 4.330374  |
| 2.148187  | 2.581578  | 1.593654  | 2.10215   | 2.503491  | 4.615984  | 3.306113  | 2.868511  | 3.047967  |
| 4.071103  | 4.331411  | 5.082393  | 5.434364  | 3.945738  | 4.327644  | 5.653426  | 4.85567   | 3.380375  |
| 4.961987  | 5.602234  | 4.243739  | 4.530943  | 5.168165  | 3.84534   | 4.841505  | 4.686137  | 2.508187  |
| 4.840612  | 5.203718  | 4.85906   | 5.929584  | 4.826735  | 4.172507  | 5.158382  | 4.985565  | 3.337427  |
| 4.581007  | 4.755269  | 4.254084  | 4.210447  | 4.541976  | 4.90985   | 3.767482  | 5.356888  | 3.609079  |
| 3.502493  | 3.916349  | 3.801647  | 3.524209  | 2.459158  | 3.314684  | 3.366888  | 3.931105  | 3.308377  |
| 5.353118  | 5.90787   | 5.593975  | 5.697866  | 5.652065  | 5.441424  | 5.699302  | 5.086225  | 4.365793  |
| 6.6369    | 7.292596  | 7.880365  | 7.394346  | 6.961229  | 7.128134  | 7.445442  | 6.787015  | 5.760088  |
| 4.923143  | 6.182086  | 4.6225    | 4.892404  | 5.69881   | 4.16144   | 4.273098  | 5.463899  | 3.841062  |
| 3.702888  | 2.45236   | 3.117422  | 2.44034   | 1.695372  | 4.214813  | 2.408274  | 2.549223  | 4.064565  |
| 6.313007  | 6.239016  | 5.87156   | 4.995848  | 6.298551  | 4.506325  | 5.091438  | 6.459819  | 4.262407  |
| 3.812055  | 4.154402  | 4.341098  | 3.341014  | 3.064937  | 3.520976  | 3.626542  | 3.341623  | 4.293655  |
| 4.612953  | 4.134404  | 3.903905  | 4.174088  | 3.252709  | 4.653305  | 3.998861  | 4.763641  | 2.901277  |
| 4.327197  | 4.725466  | 3.744777  | 4.148411  | 4.115058  | 3.242392  | 4.036801  | 3.975037  | 2.893481  |
| 4.407205  | 6.142362  | 5.303608  | 5.889548  | 5.096321  | 4.834715  | 5.060037  | 5.327108  | 3.759346  |
| 6.692819  | 6.895581  | 6.810031  | 7.093467  | 6.155293  | 6.043186  | 6.487008  | 6.78775   | 6.061318  |
| 4.048926  | 5.328759  | 3.100175  | 3.845383  | 3.662427  | 3.045324  | 2.881584  | 3.629618  | 2.633955  |
| 5.756054  | 5.67939   | 5.800573  | 6.007803  | 5.211048  | 4.628032  | 5.931127  | 5.499173  | 4.049015  |
| 4.211349  | 4.441213  | 4.527809  | 4.280581  | 5.672864  | 3.55246   | 5.077072  | 3.68983   | 3.68491   |
| 6.141473  | 6.650176  | 6.220165  | 6.318113  | 6.107956  | 6.358145  | 6.46929   | 6.502295  | 5.070624  |
| 4.037747  | 2.440482  | 3.748976  | 3.882158  | 2.82317   | 2.481518  | 3.996229  | 2.643402  | 2.430637  |
| 6.526451  | 6.499028  | 6.135916  | 6.779111  | 6.489152  | 4.951907  | 6.052953  | 6.204841  | 4.315042  |
| 6.656761  | 6.169232  | 6.015407  | 6.350506  | 6.423704  | 6.066793  | 6.513115  | 6.462473  | 4.950327  |
| 5.445998  | 5.547923  | 4.948553  | 5.685926  | 5.450132  | 5.857382  | 5.498065  | 4.699762  | 3.740261  |
| 4.276982  | 4.756062  | 5.14079   | 4.868036  | 4.435718  | 2.991983  | 3.979991  | 3.818544  | 4.812545  |

|          |          |          |          |          |          |          |          |          |
|----------|----------|----------|----------|----------|----------|----------|----------|----------|
| 5.182313 | 4.770872 | 5.271824 | 4.616006 | 4.824187 | 4.830045 | 4.300307 | 5.133049 | 3.811435 |
| 7.937935 | 8.019986 | 7.773519 | 7.965121 | 7.897638 | 7.673614 | 7.886361 | 7.945597 | 6.6711   |
| 4.007789 | 5.25353  | 5.349138 | 4.335107 | 4.918618 | 5.769893 | 3.126646 | 3.316009 | 3.132042 |
| 4.551589 | 5.599372 | 4.207873 | 4.688845 | 5.246116 | 4.562028 | 4.506437 | 5.153093 | 6.201751 |
| 4.877908 | 4.332177 | 5.739067 | 5.564541 | 5.653217 | 4.324397 | 6.932818 | 4.519215 | 4.247376 |
| 5.018682 | 5.471307 | 4.913294 | 5.608364 | 5.816338 | 4.178268 | 5.101751 | 4.946764 | 3.635716 |
| 3.74166  | 4.746697 | 2.638748 | 4.388969 | 3.993947 | 2.255339 | 2.765251 | 2.936393 | 1.79567  |
| 5.198108 | 5.362833 | 4.127223 | 5.354401 | 4.6629   | 3.899801 | 4.898465 | 5.181352 | 3.233524 |
| 4.225018 | 4.565931 | 4.153556 | 4.120657 | 3.661412 | 3.902088 | 3.335394 | 3.742362 | 3.45112  |
| 3.314687 | 4.472326 | 2.254895 | 2.652991 | 3.228143 | 3.083036 | 3.079281 | 2.79814  | 4.690284 |
| 4.385231 | 4.859754 | 4.808714 | 3.238743 | 3.030554 | 4.97671  | 3.67096  | 3.213115 | 5.0526   |
| 7.328792 | 7.335445 | 6.72023  | 8.326488 | 8.002469 | 7.724911 | 8.513534 | 8.064351 | 6.18128  |
| 6.011842 | 6.292457 | 6.166849 | 6.294955 | 6.417983 | 5.417027 | 4.877313 | 6.009859 | 5.161678 |
| 5.475396 | 2.811342 | 3.473915 | 3.845516 | 4.505056 | 3.684523 | 3.487355 | 2.166751 | 4.089446 |
| 4.954574 | 5.236903 | 5.50144  | 6.651601 | 4.212988 | 4.150045 | 5.364504 | 4.45945  | 4.316991 |
| 4.566593 | 4.788905 | 4.73145  | 4.319645 | 5.290477 | 4.275775 | 3.963534 | 5.239142 | 4.423618 |
| 5.3746   | 5.015849 | 5.063194 | 6.514714 | 5.299684 | 4.20285  | 4.673693 | 5.137034 | 3.607921 |
| 5.825339 | 6.428989 | 6.558028 | 5.685906 | 5.554821 | 4.941028 | 6.195267 | 5.507879 | 4.57146  |
| 6.834606 | 6.514701 | 5.865255 | 7.026103 | 6.309834 | 5.809289 | 5.758361 | 6.367424 | 5.068272 |
| 2.984283 | 4.66718  | 3.787812 | 3.135813 | 3.563025 | 3.07639  | 5.17566  | 3.762874 | 5.136984 |
| 2.189234 | 5.448415 | 1.822065 | 3.845516 | 2.614609 | 3.306113 | 2.503491 | 3.667503 | 2.44034  |
| 5.891913 | 5.252763 | 4.770411 | 4.688246 | 5.510317 | 5.212108 | 3.93722  | 4.763414 | 4.126537 |
| 7.319425 | 7.75353  | 7.415288 | 7.64001  | 6.881545 | 6.437169 | 7.319668 | 7.286335 | 6.050281 |
| 5.400637 | 5.519776 | 5.787633 | 5.10946  | 5.141811 | 4.222897 | 5.102856 | 4.48777  | 4.271196 |
| 4.819355 | 5.418669 | 6.303421 | 6.110392 | 5.642454 | 3.835661 | 5.3789   | 3.305814 | 3.422439 |
| 4.78548  | 4.79639  | 2.302365 | 4.233345 | 2.744261 | 4.441745 | 3.973058 | 4.668992 | 5.984675 |
| 5.218218 | 4.645721 | 5.03605  | 4.976055 | 5.124967 | 3.508844 | 5.020727 | 4.961624 | 4.23895  |
| 5.762471 | 6.407106 | 5.843331 | 5.905433 | 6.593268 | 5.121488 | 5.337824 | 6.361036 | 3.824445 |
| 4.951966 | 3.060582 | 3.45379  | 3.879    | 3.490332 | 3.595012 | 3.162654 | 3.03298  | 4.618048 |
| 4.648652 | 4.237722 | 3.947312 | 4.899348 | 3.675659 | 3.818827 | 5.061911 | 4.337699 | 5.120815 |
| 5.492133 | 5.363063 | 5.002686 | 5.291389 | 3.257203 | 3.294271 | 5.018794 | 3.636972 | 3.262819 |
| 4.508934 | 4.799198 | 4.641133 | 4.267193 | 4.106048 | 4.986726 | 4.914391 | 4.467037 | 3.776913 |
| 5.894041 | 6.43357  | 4.919765 | 5.761667 | 6.227108 | 5.03937  | 6.620247 | 6.227635 | 4.113158 |
| 2.744261 | 5.25353  | 1.920136 | 3.782602 | 4.424201 | 1.87422  | 2.018782 | 3.417507 | 2.815755 |
| 4.982149 | 3.673132 | 4.278914 | 5.199917 | 3.957417 | 3.343323 | 4.977668 | 4.812208 | 3.220596 |
| 7.366219 | 7.504973 | 6.537641 | 7.032499 | 5.32413  | 6.555528 | 6.56862  | 6.862313 | 5.376645 |
| 4.726142 | 4.213097 | 4.338785 | 3.569573 | 5.348437 | 5.506687 | 4.214992 | 4.733574 | 5.808447 |
| 6.790781 | 7.017638 | 6.371797 | 6.473155 | 6.791249 | 5.291765 | 6.830915 | 6.660285 | 6.147034 |
| 5.184216 | 5.899241 | 5.128511 | 5.924289 | 5.934032 | 3.77505  | 6.549602 | 5.175739 | 4.056519 |
| 5.232614 | 5.761254 | 5.07179  | 5.252504 | 5.541215 | 4.233611 | 5.505024 | 5.645398 | 4.373865 |
| 5.751781 | 5.86998  | 5.877288 | 5.858607 | 5.449357 | 6.009091 | 4.79296  | 4.749523 | 4.017571 |
| 4.618522 | 5.113113 | 5.933824 | 5.246541 | 5.60111  | 5.064683 | 5.353771 | 5.221806 | 3.428751 |
| 4.12358  | 4.807417 | 4.63794  | 4.165781 | 3.639305 | 4.332438 | 3.465594 | 3.868896 | 2.808738 |
| 4.363818 | 2.78124  | 4.636122 | 6.148162 | 2.378748 | 3.995166 | 5.725835 | 4.321449 | 3.554029 |
| 2.794484 | 3.432823 | 4.375339 | 3.959923 | 2.614609 | 1.498202 | 1.943345 | 1.699069 | 1.334977 |
| 3.004933 | 3.917554 | 2.799158 | 2.431232 | 3.104808 | 3.75007  | 2.673037 | 2.698172 | 4.938819 |
| 5.810109 | 5.041196 | 5.144509 | 5.540684 | 5.147657 | 6.218899 | 4.692025 | 5.023612 | 6.458493 |

|          |          |          |          |          |          |          |          |          |
|----------|----------|----------|----------|----------|----------|----------|----------|----------|
| 4.777278 | 4.749291 | 4.193971 | 4.612242 | 4.079805 | 3.214715 | 3.719979 | 4.707644 | 3.598216 |
| 4.074697 | 4.943726 | 4.355628 | 5.424167 | 4.743084 | 2.690521 | 3.394346 | 4.079224 | 2.865471 |
| 4.450933 | 5.346723 | 4.935936 | 4.645276 | 3.739026 | 3.689808 | 4.020487 | 4.378384 | 3.002247 |
| 4.035582 | 5.299328 | 4.596275 | 3.230637 | 3.98061  | 2.306843 | 3.073932 | 3.116961 | 3.1403   |
| 4.743088 | 4.65159  | 3.906344 | 5.189543 | 4.73808  | 3.021796 | 4.565678 | 4.214978 | 3.936865 |
| 4.68166  | 5.709971 | 4.988695 | 5.103013 | 6.545136 | 3.839099 | 4.159095 | 4.508381 | 3.200941 |
| 5.717098 | 6.814616 | 5.454866 | 6.500038 | 6.203883 | 4.778168 | 5.861292 | 6.266845 | 4.2318   |
| 8.183525 | 8.389066 | 8.763717 | 9.023071 | 7.882854 | 7.756736 | 8.817107 | 8.144699 | 6.442299 |
| 5.93263  | 5.240859 | 6.367431 | 6.240475 | 6.248923 | 4.448665 | 5.089513 | 5.579349 | 4.183341 |
| 5.030151 | 5.035582 | 4.766243 | 6.005151 | 5.728177 | 3.519786 | 5.920421 | 6.100549 | 4.351749 |
| 5.346809 | 5.335518 | 4.938329 | 5.368033 | 4.634918 | 3.7696   | 4.697017 | 4.822378 | 3.362903 |
| 6.509657 | 6.857742 | 6.155664 | 6.263424 | 6.661375 | 5.888492 | 5.801446 | 6.586426 | 5.237592 |
| 4.542687 | 3.926331 | 4.28658  | 4.083291 | 4.014234 | 3.241308 | 3.470761 | 3.448547 | 2.837241 |
| 4.33053  | 4.799755 | 4.358028 | 4.250292 | 3.690431 | 3.778162 | 4.352975 | 4.571855 | 2.971808 |
| 4.761478 | 5.591446 | 5.026771 | 4.637566 | 5.51952  | 4.984702 | 3.964179 | 5.641063 | 3.967852 |
| 5.4598   | 5.697585 | 6.175085 | 5.634468 | 6.616466 | 4.934902 | 6.154336 | 6.098064 | 4.719777 |
| 5.005399 | 5.836205 | 5.860307 | 5.240158 | 4.827019 | 4.337034 | 5.212388 | 5.525262 | 4.001325 |
| 2.667141 | 2.647751 | 2.706647 | 2.363395 | 3.880031 | 3.152217 | 2.905091 | 2.246939 | 3.953856 |
| 5.812325 | 5.420145 | 4.895377 | 6.07221  | 4.933254 | 4.674208 | 5.2933   | 5.343029 | 3.678904 |
| 3.908953 | 3.585392 | 3.234329 | 3.900329 | 2.744261 | 3.841502 | 3.306113 | 1.699069 | 5.146025 |
| 5.376246 | 5.747397 | 4.324103 | 5.003235 | 5.860027 | 4.046828 | 3.128895 | 4.73601  | 3.693406 |
| 2.577189 | 2.9642   | 2.66716  | 2.577667 | 3.220111 | 5.305239 | 3.078916 | 2.41462  | 4.036034 |
| 5.259081 | 5.559891 | 4.525459 | 5.079022 | 5.47861  | 5.43662  | 5.489071 | 3.981911 | 3.60461  |
| 3.603581 | 4.840617 | 4.224148 | 4.164644 | 3.984073 | 2.963932 | 2.848888 | 3.852783 | 2.768475 |
| 4.74231  | 3.885181 | 5.367104 | 5.221869 | 4.973284 | 5.650426 | 5.292563 | 4.423003 | 4.590157 |
| 8.894176 | 8.81919  | 8.993179 | 9.202011 | 8.664214 | 9.138551 | 8.157068 | 8.075478 | 7.162728 |
| 5.666956 | 5.851161 | 5.048068 | 5.699472 | 5.704044 | 4.37202  | 4.5395   | 5.151371 | 4.246259 |
| 5.365935 | 4.221987 | 5.522466 | 6.012631 | 4.980384 | 3.684523 | 5.016106 | 5.190047 | 2.588271 |
| 5.598986 | 4.897451 | 5.792725 | 6.447897 | 5.320926 | 4.912792 | 5.738357 | 6.151357 | 4.108023 |
| 4.057226 | 5.069879 | 3.470418 | 4.125284 | 2.655885 | 3.79144  | 2.857599 | 3.572472 | 4.765847 |
| 5.22089  | 5.598299 | 5.408372 | 5.504887 | 4.896469 | 4.164451 | 4.707042 | 5.478332 | 3.677617 |
| 6.043028 | 4.729468 | 4.818393 | 4.303106 | 6.074732 | 4.44457  | 5.286558 | 5.639481 | 3.645269 |
| 2.995961 | 3.099329 | 2.853363 | 2.803207 | 4.100015 | 3.833672 | 3.333104 | 3.359793 | 4.167477 |
| 6.611062 | 6.366513 | 7.273265 | 6.665229 | 7.739617 | 5.611113 | 8.280902 | 7.164768 | 6.421566 |
| 5.229185 | 6.039543 | 6.502797 | 6.218809 | 6.079591 | 5.772476 | 6.771334 | 5.475909 | 4.542286 |
| 4.919604 | 5.444828 | 5.83669  | 5.1335   | 4.107103 | 3.533512 | 4.135811 | 3.945999 | 3.614714 |
| 5.209518 | 5.86961  | 6.199014 | 6.427597 | 6.070903 | 5.836527 | 6.20941  | 6.404139 | 4.220726 |
| 4.973414 | 4.648632 | 5.560413 | 5.936908 | 3.21809  | 3.089096 | 5.680592 | 5.190968 | 2.517408 |
| 3.772452 | 4.338726 | 4.4903   | 5.254927 | 4.749714 | 3.229235 | 5.088824 | 3.551632 | 3.0709   |
| 4.433182 | 4.978402 | 4.026751 | 4.579341 | 4.823625 | 4.249565 | 4.390594 | 4.666716 | 3.456103 |
| 3.749222 | 4.958176 | 3.562685 | 4.422298 | 4.617431 | 3.902475 | 3.164854 | 4.544027 | 3.038403 |
| 3.434038 | 4.683842 | 3.215252 | 2.901792 | 2.998358 | 1.991306 | 2.4187   | 3.268413 | 2.216041 |
| 5.819378 | 4.012791 | 4.301076 | 4.481608 | 4.547496 | 5.268578 | 4.17407  | 5.487142 | 5.465166 |
| 3.187433 | 3.44612  | 3.677707 | 3.562526 | 3.562958 | 5.362203 | 4.354335 | 4.268716 | 4.877238 |
| 5.107833 | 3.754158 | 4.236504 | 4.257529 | 5.285497 | 5.511025 | 4.958825 | 4.046089 | 5.827189 |
| 5.669911 | 4.652011 | 6.030807 | 5.972738 | 4.923757 | 4.71048  | 5.560302 | 5.25816  | 4.767513 |
| 5.478152 | 4.743286 | 5.332049 | 4.670525 | 5.801649 | 4.485034 | 4.498213 | 5.910552 | 3.814276 |

|          |          |          |          |          |          |          |          |          |
|----------|----------|----------|----------|----------|----------|----------|----------|----------|
| 5.332242 | 5.146315 | 3.967978 | 5.099025 | 5.824685 | 6.548116 | 5.46244  | 5.876303 | 6.66982  |
| 1.859146 | 1.811784 | 1.593654 | 1.859146 | 1.308809 | 1.87422  | 2.018782 | 2.166751 | 2.44034  |
| 5.251931 | 6.119899 | 6.173018 | 6.988339 | 5.449164 | 5.462402 | 5.92016  | 4.171254 | 5.181016 |
| 5.810159 | 5.234907 | 4.94497  | 5.725898 | 4.101517 | 3.429139 | 5.323563 | 4.866989 | 2.429673 |
| 6.411093 | 6.097786 | 4.317215 | 5.636594 | 6.134299 | 4.781836 | 5.614509 | 5.718914 | 3.203144 |
| 4.08703  | 4.095148 | 3.076821 | 3.660554 | 5.723393 | 3.222498 | 4.578761 | 4.233516 | 2.930748 |
| 2.670399 | 3.073703 | 3.54078  | 3.110723 | 3.858824 | 2.56697  | 3.507176 | 3.758943 | 1.998194 |
| 2.885726 | 3.031049 | 2.913231 | 3.132345 | 3.474865 | 4.368205 | 3.295436 | 3.732814 | 4.104798 |
| 4.151186 | 5.153962 | 5.112979 | 4.656588 | 5.647791 | 5.563969 | 3.58243  | 5.234945 | 3.460935 |
| 3.381403 | 4.383675 | 2.197844 | 3.079612 | 3.129499 | 3.306113 | 2.094313 | 1.562301 | 1.804428 |
| 4.27146  | 4.950583 | 4.530625 | 4.969616 | 5.242845 | 5.240424 | 4.565669 | 4.541211 | 4.169856 |
| 5.868019 | 5.696224 | 4.976328 | 5.653933 | 6.312047 | 5.387186 | 4.96481  | 6.144371 | 4.053515 |
| 3.031916 | 1.748238 | 4.207873 | 2.302365 | 3.952795 | 5.738531 | 3.306113 | 3.047967 | 4.954001 |
| 7.829214 | 7.643246 | 8.210636 | 8.066678 | 7.388499 | 8.293499 | 8.469319 | 8.217207 | 6.924143 |
| 4.687644 | 5.424574 | 5.255994 | 3.845516 | 3.952795 | 3.451079 | 5.648929 | 3.751826 | 4.913465 |
| 4.644984 | 4.757277 | 3.344198 | 3.905916 | 4.300733 | 3.539591 | 4.321333 | 4.489467 | 3.870219 |
| 3.956795 | 3.180626 | 4.029816 | 4.450371 | 4.341899 | 5.776654 | 4.564269 | 3.553755 | 4.254454 |
| 5.568683 | 5.790984 | 4.975285 | 5.243979 | 4.70016  | 3.670261 | 4.096719 | 5.123918 | 3.639881 |
| 6.796181 | 6.1605   | 5.269879 | 7.230505 | 5.793636 | 5.436475 | 6.237735 | 6.048297 | 5.041215 |
| 8.177053 | 8.584687 | 6.928551 | 7.832459 | 8.377795 | 7.196333 | 8.129189 | 7.547039 | 7.223269 |
| 2.026528 | 2.074684 | 2.288476 | 2.148703 | 2.240115 | 4.093155 | 2.248664 | 1.640895 | 2.996628 |
| 6.768784 | 5.567659 | 5.587907 | 5.412529 | 6.557048 | 6.06469  | 6.196483 | 7.502664 | 4.37199  |
| 5.445637 | 4.402539 | 2.991252 | 4.117925 | 5.104516 | 3.244332 | 3.038812 | 4.708306 | 2.757907 |
| 3.830433 | 4.151292 | 3.95336  | 2.700896 | 3.310321 | 3.138509 | 4.311142 | 4.492913 | 2.692468 |
| 4.684779 | 5.228806 | 4.752512 | 5.288329 | 4.656113 | 3.260966 | 3.72183  | 3.62626  | 2.885605 |
| 5.165783 | 5.124421 | 3.743099 | 5.068185 | 5.185268 | 2.410538 | 3.97571  | 4.519166 | 2.693485 |
| 2.875372 | 2.975539 | 1.970961 | 2.910196 | 4.061312 | 3.38011  | 3.410084 | 3.106949 | 4.186631 |
| 6.102507 | 6.077129 | 5.828124 | 6.175066 | 5.888072 | 5.562779 | 6.069978 | 6.202168 | 4.761194 |
| 3.266557 | 3.925753 | 2.302365 | 3.959923 | 3.738727 | 1.208446 | 4.444621 | 2.769645 | 1.859146 |
| 5.621824 | 5.611134 | 5.124356 | 6.277854 | 5.080264 | 4.048675 | 5.15169  | 5.520526 | 4.228508 |
| 6.737868 | 7.393693 | 6.131829 | 6.094655 | 7.226856 | 8.338712 | 5.986036 | 6.398216 | 7.557944 |
| 6.773863 | 7.392911 | 7.329759 | 7.128083 | 7.087352 | 6.235101 | 7.536019 | 6.713783 | 5.894809 |
| 2.944816 | 2.720864 | 1.977665 | 3.004311 | 3.21733  | 2.099422 | 2.914422 | 2.016245 | 1.550227 |
| 6.441767 | 6.073583 | 5.873012 | 6.99558  | 6.715529 | 4.993611 | 5.724729 | 6.369545 | 4.724468 |
| 4.66226  | 4.827319 | 4.703383 | 4.863265 | 5.890358 | 3.367163 | 4.512338 | 4.38935  | 3.891533 |
| 6.683393 | 6.335915 | 5.403186 | 5.470487 | 6.906635 | 5.706965 | 5.647458 | 7.779443 | 4.399277 |
| 6.298162 | 5.574622 | 6.934043 | 6.2094   | 5.379479 | 6.103004 | 5.839442 | 6.26877  | 4.870114 |
| 4.802846 | 4.366661 | 4.480979 | 4.330869 | 4.724737 | 6.188064 | 5.822469 | 4.560861 | 5.602139 |
| 6.121689 | 6.374721 | 5.784846 | 6.559435 | 6.37989  | 5.109722 | 6.464131 | 6.78494  | 4.27822  |
| 4.696708 | 4.06328  | 4.802106 | 4.305876 | 4.652378 | 5.66573  | 5.595589 | 6.019013 | 3.596512 |
| 5.048616 | 4.908438 | 5.838213 | 4.496621 | 4.809696 | 5.702135 | 4.527774 | 4.20768  | 3.667307 |
| 2.743977 | 2.924907 | 3.036441 | 3.721284 | 3.695229 | 3.218555 | 3.981191 | 2.700537 | 4.542115 |
| 4.596003 | 5.337735 | 4.686638 | 5.399324 | 5.24768  | 4.057805 | 3.985434 | 4.519837 | 3.784324 |
| 4.882983 | 6.080453 | 4.250385 | 5.184248 | 4.693979 | 3.133704 | 4.973412 | 4.711604 | 3.806361 |
| 4.193227 | 4.396505 | 4.974817 | 4.768468 | 3.366337 | 4.128719 | 5.077073 | 4.394339 | 3.521035 |
| 2.742116 | 2.625834 | 2.928561 | 2.821229 | 2.894056 | 3.15368  | 2.804266 | 2.70834  | 4.161769 |
| 6.513053 | 6.243445 | 5.64521  | 6.299053 | 6.053794 | 6.201631 | 5.636648 | 5.767551 | 5.127641 |

|          |          |          |          |          |          |          |          |          |
|----------|----------|----------|----------|----------|----------|----------|----------|----------|
| 3.822053 | 3.260327 | 3.867434 | 3.341972 | 4.000445 | 2.577277 | 4.20884  | 3.555942 | 2.919513 |
| 3.479142 | 3.046229 | 3.240613 | 3.690101 | 3.432322 | 2.796458 | 2.934171 | 3.747642 | 2.537522 |
| 4.934182 | 6.064845 | 5.701361 | 6.622984 | 4.955497 | 5.902321 | 6.286746 | 6.145436 | 4.568532 |
| 5.824005 | 4.861167 | 5.377387 | 5.933865 | 6.16516  | 5.088251 | 6.093622 | 5.161892 | 4.492648 |
| 4.273762 | 2.506228 | 2.411629 | 3.446836 | 2.995083 | 4.045013 | 3.570424 | 2.238697 | 4.733973 |
| 4.076744 | 2.502536 | 3.074808 | 2.895318 | 4.350852 | 3.43804  | 2.711698 | 4.852867 | 2.036769 |
| 5.318418 | 4.868205 | 4.969062 | 5.554235 | 5.406567 | 4.189052 | 4.851887 | 4.959555 | 4.121922 |
| 6.174157 | 6.70419  | 6.496389 | 7.245071 | 6.485455 | 5.287793 | 5.334261 | 5.148628 | 4.519513 |
| 5.1103   | 6.042825 | 5.083654 | 5.981339 | 5.958934 | 4.658347 | 5.973308 | 5.555945 | 3.220715 |
| 4.091868 | 3.357953 | 3.427557 | 4.511819 | 1.956264 | 3.944688 | 4.553328 | 4.29168  | 2.577315 |
| 5.160362 | 4.854135 | 3.894218 | 4.331983 | 4.568343 | 5.104961 | 4.233338 | 5.381783 | 5.611139 |
| 5.042854 | 5.358753 | 5.642788 | 6.14957  | 4.705912 | 5.523052 | 4.5835   | 5.483859 | 4.452247 |
| 3.93922  | 2.159006 | 4.081574 | 5.479875 | 3.901859 | 4.052362 | 4.79519  | 3.736011 | 1.709098 |
| 3.711378 | 2.506228 | 2.643434 | 3.584575 | 3.381403 | 1.792423 | 4.120427 | 3.481181 | 2.236078 |
| 4.444462 | 5.118295 | 3.209805 | 3.07425  | 3.815101 | 2.952541 | 3.667406 | 3.342243 | 4.893212 |
| 4.837329 | 4.753121 | 4.959197 | 5.086811 | 5.393144 | 3.161254 | 4.701024 | 5.179962 | 3.320044 |
| 2.509443 | 3.04098  | 3.414804 | 2.447186 | 4.752486 | 2.20123  | 3.826332 | 3.015501 | 4.605786 |
| 4.603042 | 3.827319 | 4.700487 | 3.447556 | 4.539348 | 6.060569 | 4.002611 | 4.647311 | 5.594662 |
| 6.21658  | 6.514065 | 6.531103 | 6.084378 | 6.427446 | 4.700932 | 5.566262 | 6.013837 | 5.479483 |
| 2.519482 | 2.847348 | 2.163429 | 3.231313 | 3.063798 | 2.106299 | 3.738269 | 2.649164 | 5.12133  |
| 6.574916 | 6.693284 | 6.754868 | 7.372678 | 6.156956 | 5.791489 | 6.545899 | 6.126433 | 5.322352 |
| 4.909902 | 4.157615 | 4.704301 | 4.930251 | 5.319329 | 6.579364 | 5.763904 | 4.677925 | 6.068951 |
| 9.103763 | 9.170214 | 9.402261 | 9.622869 | 9.69897  | 8.368579 | 9.680117 | 8.933948 | 8.120584 |
| 5.059847 | 5.618883 | 5.749358 | 5.495343 | 5.506362 | 3.572603 | 5.027544 | 5.447335 | 4.450685 |
| 5.068253 | 3.827795 | 5.19523  | 5.227105 | 4.269138 | 3.349744 | 4.443073 | 5.064329 | 3.534201 |
| 2.544649 | 2.511761 | 3.819887 | 3.829264 | 2.571241 | 4.474404 | 3.685724 | 2.990222 | 2.44034  |
| 4.3335   | 3.426817 | 4.445933 | 3.29341  | 3.691152 | 4.628733 | 3.137351 | 3.037486 | 4.808517 |
| 7.287138 | 7.646237 | 7.537788 | 7.319549 | 6.742895 | 6.443979 | 7.661604 | 7.755885 | 6.479578 |
| 5.224995 | 5.105526 | 4.433902 | 5.623101 | 4.781905 | 3.169743 | 4.878355 | 4.761573 | 3.683365 |
| 6.696142 | 6.563991 | 6.832757 | 6.981364 | 7.010735 | 5.568133 | 6.860804 | 6.265217 | 5.445628 |
| 4.281205 | 4.11493  | 4.429812 | 3.863712 | 4.201627 | 3.715393 | 4.706619 | 3.699709 | 5.004722 |
| 5.07698  | 3.894396 | 5.481975 | 4.626411 | 3.952795 | 5.641649 | 3.306113 | 3.751826 | 5.376539 |
| 4.57254  | 5.324667 | 5.485726 | 4.682933 | 4.451882 | 3.461066 | 3.381143 | 4.646159 | 3.29434  |
| 1.944796 | 1.511263 | 1.323772 | 3.380052 | 2.744261 | 3.763855 | 4.192776 | 1.630825 | 3.132042 |
| 3.089719 | 3.555256 | 3.404381 | 3.182124 | 3.132689 | 3.766678 | 4.073625 | 2.804725 | 4.609875 |
| 3.832143 | 5.088819 | 4.453381 | 4.659102 | 4.929853 | 3.806371 | 4.787166 | 5.286334 | 4.255894 |
| 6.462196 | 6.263688 | 6.359841 | 6.425327 | 6.333792 | 4.528942 | 5.661457 | 5.659473 | 5.073698 |
| 2.211148 | 2.972735 | 2.412921 | 2.387677 | 2.845506 | 4.155747 | 2.027468 | 2.777097 | 4.506113 |
| 2.302453 | 3.767226 | 2.950968 | 2.462396 | 2.206557 | 3.1396   | 2.549419 | 2.57594  | 3.883058 |
| 4.462213 | 4.845051 | 5.423037 | 6.686188 | 4.884741 | 4.221381 | 5.575986 | 4.90664  | 3.87568  |
| 3.530361 | 3.293999 | 4.237985 | 3.825601 | 3.858857 | 3.041005 | 2.597012 | 2.886722 | 2.038838 |
| 3.331809 | 2.952722 | 3.826568 | 3.733049 | 4.669475 | 4.205756 | 3.701864 | 3.749889 | 4.818908 |
| 5.292367 | 5.750817 | 4.979033 | 4.921688 | 5.068451 | 3.948666 | 5.145576 | 6.065107 | 3.25126  |
| 4.692174 | 4.687356 | 4.63437  | 4.847132 | 4.61657  | 3.931898 | 4.003834 | 4.791122 | 3.701794 |
| 6.52225  | 6.330546 | 5.892788 | 6.973607 | 6.463334 | 6.207156 | 6.17763  | 6.793215 | 5.43852  |
| 3.790983 | 2.124646 | 2.692241 | 2.987685 | 1.688676 | 4.854855 | 3.033    | 2.034555 | 4.267473 |
| 2.931665 | 3.571264 | 4.112139 | 3.312222 | 4.716275 | 4.830829 | 4.333171 | 2.978738 | 4.662993 |

|          |          |          |          |          |          |          |          |          |
|----------|----------|----------|----------|----------|----------|----------|----------|----------|
| 3.155511 | 2.798313 | 3.561789 | 3.208909 | 3.747694 | 3.620432 | 3.376542 | 3.219083 | 4.245607 |
| 5.942996 | 6.543598 | 5.907772 | 5.80548  | 6.278094 | 5.595945 | 6.436962 | 5.509164 | 5.919462 |
| 5.312712 | 5.46357  | 6.125425 | 6.087561 | 6.698324 | 6.207088 | 6.524806 | 4.990025 | 4.80887  |
| 5.108007 | 5.340559 | 4.210772 | 5.353728 | 5.913313 | 4.32269  | 5.028412 | 5.786127 | 3.992257 |
| 2.973394 | 2.811342 | 4.683992 | 3.01579  | 4.424201 | 4.93276  | 3.659002 | 3.145371 | 5.030539 |
| 5.292976 | 4.317069 | 4.856079 | 4.532081 | 5.329921 | 5.959961 | 5.364848 | 4.039988 | 6.241019 |
| 6.6512   | 4.350638 | 7.129154 | 7.162194 | 6.554984 | 5.907568 | 5.017316 | 5.801151 | 5.650693 |
| 3.934388 | 4.055467 | 2.795644 | 4.209226 | 3.572233 | 3.16588  | 2.529451 | 3.458156 | 4.586579 |
| 3.006635 | 2.558925 | 2.794838 | 2.614792 | 2.650599 | 3.748046 | 1.953274 | 2.428752 | 3.995747 |
| 4.850338 | 3.206729 | 4.292965 | 5.147796 | 4.654495 | 2.216088 | 4.729267 | 4.614728 | 2.73874  |
| 7.552836 | 7.313434 | 7.063756 | 7.886254 | 7.004058 | 6.202199 | 7.074248 | 7.458021 | 5.886493 |
| 3.467816 | 3.344472 | 4.250419 | 2.704131 | 3.006681 | 3.168257 | 3.955246 | 2.913696 | 3.710485 |
| 5.349039 | 5.97673  | 4.651598 | 5.522789 | 4.615469 | 5.171757 | 4.456172 | 5.057158 | 6.180762 |
| 4.236766 | 4.670891 | 4.463758 | 4.370506 | 4.98737  | 6.52386  | 5.008188 | 4.386363 | 5.323125 |
| 4.379685 | 3.999966 | 4.664563 | 3.641275 | 4.246429 | 5.451306 | 4.986587 | 4.115482 | 5.249327 |



| Stob_10b_ | Stob_8a_H | Stob_9d_H | Stob_10d_ | Stob_11d_ | Stob_4f_HI | Stob_7f_HI | Stob_15f_ | pValue   |
|-----------|-----------|-----------|-----------|-----------|------------|------------|-----------|----------|
| 6.111752  | 5.629568  | 4.458633  | 5.663361  | 6.518271  | 6.603599   | 5.121583   | 5.833853  | 0.001884 |
| 3.102816  | 3.572745  | 3.238367  | 2.752461  | 4.467465  | 4.354859   | 3.94605    | 4.146335  | 0.000723 |
| 4.767276  | 3.590288  | 3.479273  | 2.758878  | 3.288987  | 3.650066   | 2.827775   | 4.735076  | 0.004071 |
| 5.313552  | 4.727382  | 5.206574  | 5.322094  | 6.101617  | 5.702293   | 5.906081   | 5.601031  | 0.000476 |
| 4.961022  | 3.942976  | 3.769609  | 3.947468  | 4.44092   | 5.21117    | 3.716668   | 3.397824  | 0.001453 |
| 4.128747  | 3.0236    | 4.406277  | 3.292191  | 2.44034   | 3.559595   | 1.967605   | 3.455144  | 0.004284 |
| 3.878431  | 4.309991  | 2.731554  | 3.387982  | 3.055826  | 3.411033   | 3.560264   | 3.968533  | 0.000558 |
| 7.584371  | 7.301685  | 6.7175    | 6.680688  | 7.468394  | 8.164045   | 7.657486   | 7.962861  | 3.40E-05 |
| 3.269654  | 2.145399  | 2.399166  | 1.881401  | 3.055125  | 2.650165   | 2.755843   | 3.053231  | 0.000343 |
| 3.78112   | 2.470176  | 1.815641  | 2.077412  | 2.469101  | 4.61098    | 2.709001   | 3.797472  | 0.00375  |
| 3.84644   | 3.93241   | 3.845284  | 3.783274  | 3.67158   | 3.785168   | 3.805271   | 3.740153  | 9.55E-08 |
| 3.870227  | 2.886665  | 2.339745  | 3.059021  | 3.452587  | 4.155216   | 2.537382   | 3.123488  | 1.65E-05 |
| 3.787648  | 3.46064   | 2.983336  | 3.266625  | 3.22747   | 3.081124   | 3.634833   | 4.082642  | 0.003215 |
| 5.861961  | 4.716973  | 4.064519  | 5.019014  | 5.866239  | 5.714537   | 4.521534   | 4.983794  | 0.003606 |
| 5.870852  | 4.820451  | 4.614486  | 4.446977  | 5.702217  | 5.648152   | 3.765128   | 4.624159  | 0.002214 |
| 3.215342  | 3.212062  | 1.956957  | 2.520925  | 1.953553  | 2.263276   | 1.893291   | 2.519415  | 0.00146  |
| 2.734328  | 2.526054  | 1.951637  | 2.043419  | 2.224874  | 2.542217   | 2.479633   | 3.083043  | 0.000309 |
| 4.409504  | 4.435497  | 3.727071  | 3.687541  | 4.496532  | 5.175371   | 4.728077   | 5.073275  | 0.00106  |
| 5.919248  | 4.64527   | 4.269585  | 4.488397  | 5.906911  | 4.989417   | 4.773363   | 4.950753  | 0.003207 |
| 3.34037   | 3.357733  | 4.110889  | 4.854331  | 3.75382   | 4.258204   | 4.762705   | 4.422769  | 0.002273 |
| 4.209202  | 4.478037  | 4.660655  | 4.730435  | 4.01778   | 3.133843   | 3.794791   | 3.595321  | 0.001257 |
| 4.45278   | 3.480551  | 3.53246   | 3.351696  | 3.445316  | 3.933568   | 3.831832   | 4.020242  | 0.000276 |
| 5.255645  | 2.175257  | 1.99077   | 2.018631  | 2.849171  | 4.250923   | 3.287194   | 4.234713  | 0.003097 |
| 4.967198  | 4.134345  | 3.658215  | 3.723479  | 4.154692  | 4.805602   | 3.777742   | 4.198163  | 0.000466 |
| 3.292806  | 3.389871  | 3.72958   | 4.092069  | 3.456095  | 5.138119   | 4.013636   | 3.542851  | 0.002903 |
| 3.16813   | 3.668615  | 2.418338  | 2.329296  | 2.351022  | 2.070634   | 2.630017   | 2.476716  | 0.00331  |
| 4.354514  | 4.174783  | 4.11974   | 5.285038  | 5.143544  | 4.663373   | 4.41944    | 5.304924  | 0.002567 |
| 5.973737  | 6.738789  | 5.869251  | 5.408488  | 5.896879  | 6.65226    | 6.906857   | 7.551729  | 0.003269 |
| 5.354003  | 3.6542    | 2.889384  | 3.883158  | 4.410883  | 4.449987   | 3.370388   | 3.930136  | 0.001284 |
| 3.726262  | 4.188938  | 5.057417  | 4.574464  | 3.427996  | 3.600511   | 3.590938   | 3.384227  | 8.96E-05 |
| 5.659268  | 3.796283  | 4.910839  | 4.96656   | 6.018359  | 5.162169   | 4.425156   | 4.578117  | 0.004114 |
| 4.711271  | 4.24288   | 4.727048  | 4.995189  | 4.608961  | 4.807322   | 4.908619   | 3.469909  | 0.000376 |
| 3.488413  | 3.780887  | 2.891986  | 3.818468  | 4.055839  | 3.524444   | 3.740113   | 3.390441  | 0.000156 |
| 4.126267  | 2.493271  | 2.876157  | 2.880453  | 3.961717  | 3.432085   | 3.074246   | 3.567659  | 0.002373 |
| 5.296004  | 4.413508  | 3.704246  | 3.833017  | 3.868326  | 5.234603   | 4.032597   | 4.227876  | 0.001039 |
| 6.829644  | 5.401673  | 4.699004  | 5.023949  | 6.162894  | 5.229      | 4.902048   | 5.740373  | 0.003046 |
| 3.59628   | 2.128491  | 1.549384  | 2.165124  | 3.451671  | 2.663158   | 2.432252   | 2.534035  | 0.001356 |
| 5.333769  | 4.551723  | 3.784896  | 4.247485  | 4.239875  | 4.361669   | 4.060476   | 5.303615  | 0.00057  |
| 4.699536  | 3.249233  | 2.766105  | 2.476297  | 2.996699  | 3.470517   | 3.659243   | 3.962616  | 0.001043 |
| 5.59198   | 5.076885  | 5.768004  | 5.211512  | 5.341401  | 6.284969   | 4.176976   | 6.145942  | 0.0022   |
| 3.480152  | 1.636362  | 2.319311  | 2.600587  | 2.57765   | 2.391438   | 1.684544   | 2.347584  | 0.003599 |
| 5.373313  | 4.458961  | 3.972438  | 4.323604  | 5.234577  | 4.732636   | 3.891881   | 4.822941  | 1.83E-06 |
| 6.271619  | 5.137378  | 5.042616  | 5.222911  | 5.997879  | 5.929087   | 5.281334   | 6.243478  | 0.001577 |
| 4.262259  | 4.956303  | 4.488487  | 4.077565  | 4.386437  | 4.917953   | 4.919098   | 4.082418  | 0.000134 |
| 4.114807  | 3.076814  | 3.214459  | 2.834348  | 3.253107  | 3.121797   | 2.999588   | 3.012734  | 0.002962 |

|          |          |          |          |          |          |          |          |          |
|----------|----------|----------|----------|----------|----------|----------|----------|----------|
| 4.854407 | 3.331134 | 3.726307 | 3.520842 | 3.667123 | 4.700707 | 4.855535 | 3.945221 | 0.003038 |
| 6.714078 | 6.966586 | 6.882153 | 5.976614 | 7.265495 | 7.48601  | 6.607102 | 7.923702 | 0.0022   |
| 3.553923 | 2.728673 | 3.852953 | 2.009184 | 3.133843 | 4.092615 | 2.614609 | 2.310846 | 0.002931 |
| 4.563121 | 6.059466 | 5.335388 | 6.570804 | 5.690184 | 5.884191 | 6.476393 | 5.103458 | 0.000487 |
| 4.92206  | 3.251685 | 3.407391 | 3.790572 | 4.137327 | 3.87935  | 3.574755 | 5.017562 | 0.000366 |
| 5.347749 | 2.664314 | 3.242903 | 3.473791 | 3.941623 | 4.683957 | 4.302115 | 5.092826 | 0.004213 |
| 3.795213 | 3.277725 | 2.109713 | 2.343959 | 3.074815 | 2.308258 | 2.0772   | 2.449927 | 0.00413  |
| 4.681211 | 3.273988 | 2.470718 | 2.938384 | 4.648    | 3.770839 | 2.97934  | 3.983963 | 0.003158 |
| 4.318005 | 2.777772 | 2.449825 | 2.793903 | 3.039263 | 2.838122 | 2.933523 | 3.439492 | 0.002515 |
| 4.288992 | 4.256318 | 5.705325 | 4.734522 | 3.165648 | 4.311928 | 4.075321 | 4.061639 | 0.00113  |
| 4.952924 | 3.771504 | 5.567918 | 5.60777  | 4.555067 | 5.307285 | 5.086683 | 4.667406 | 0.003288 |
| 7.409629 | 6.00517  | 5.553864 | 7.030586 | 7.798982 | 7.414498 | 5.744491 | 6.970946 | 0.003168 |
| 5.684368 | 4.467148 | 4.434924 | 3.803313 | 5.693146 | 5.74214  | 4.510704 | 4.755393 | 0.002083 |
| 5.508066 | 4.478037 | 5.091758 | 5.891077 | 4.370882 | 5.464073 | 5.849805 | 5.103458 | 0.00155  |
| 4.715546 | 3.295221 | 4.174675 | 3.520576 | 4.622862 | 4.087854 | 3.554367 | 4.774267 | 0.001493 |
| 4.557382 | 3.425559 | 3.007551 | 2.988338 | 4.01426  | 3.346308 | 2.954672 | 4.092666 | 0.003829 |
| 3.814113 | 3.838682 | 3.422111 | 3.940352 | 5.092974 | 3.724427 | 4.290137 | 4.777948 | 0.000452 |
| 4.324153 | 5.288762 | 4.672237 | 4.545006 | 5.514548 | 5.34515  | 4.526671 | 5.301347 | 0.001069 |
| 6.686553 | 5.152825 | 4.509321 | 5.124634 | 5.50913  | 6.416142 | 4.841365 | 5.587296 | 0.003751 |
| 4.189307 | 5.145009 | 5.56447  | 5.313463 | 4.592069 | 4.931798 | 4.500567 | 5.20976  | 6.93E-05 |
| 2.001516 | 1.847682 | 1.779085 | 2.419918 | 1.962452 | 2.386573 | 1.503908 | 2.245653 | 0.00134  |
| 3.437805 | 3.35441  | 4.111702 | 4.20974  | 3.613274 | 4.389804 | 3.719571 | 4.257613 | 3.58E-05 |
| 6.789261 | 6.306057 | 5.238681 | 5.956788 | 7.151585 | 6.562333 | 5.234385 | 6.901808 | 0.003792 |
| 4.737395 | 3.909109 | 3.48987  | 3.477686 | 4.752422 | 4.824748 | 4.140231 | 4.563619 | 0.000514 |
| 4.134954 | 3.076717 | 4.211506 | 4.106066 | 3.625454 | 3.890028 | 3.140823 | 4.502903 | 0.000573 |
| 4.036504 | 6.381777 | 5.248593 | 6.334759 | 5.561439 | 4.630724 | 5.891077 | 5.650803 | 0.003879 |
| 5.238865 | 3.720083 | 3.541407 | 3.368148 | 3.895162 | 4.499803 | 3.507872 | 3.862349 | 0.001776 |
| 5.781797 | 4.131271 | 3.179532 | 4.55746  | 5.076581 | 6.117295 | 4.35023  | 4.925171 | 0.004143 |
| 4.429124 | 4.07647  | 4.667476 | 4.692671 | 4.352222 | 4.471747 | 3.527152 | 5.336906 | 0.00051  |
| 5.025242 | 5.738461 | 5.59806  | 5.594678 | 5.144416 | 5.270447 | 5.046805 | 5.350709 | 1.82E-05 |
| 3.693035 | 2.584506 | 2.185651 | 2.693754 | 3.481327 | 4.066905 | 2.925869 | 3.215871 | 0.0002   |
| 4.680138 | 4.37388  | 3.671938 | 3.45631  | 3.206731 | 3.82682  | 3.715237 | 3.725179 | 0.003052 |
| 6.103445 | 5.412947 | 3.79686  | 4.485863 | 5.20833  | 5.49815  | 3.933532 | 4.740278 | 0.004317 |
| 2.873808 | 1.489967 | 2.033522 | 2.419918 | 2.975749 | 2.168146 | 1.503908 | 2.178617 | 0.00232  |
| 3.275984 | 4.070275 | 3.706748 | 3.818355 | 3.639969 | 4.204908 | 4.172849 | 3.617665 | 0.003368 |
| 5.359922 | 6.063643 | 5.095403 | 4.773447 | 6.239022 | 5.91811  | 5.75542  | 6.954154 | 0.00353  |
| 4.532316 | 5.326038 | 5.221749 | 5.830101 | 4.896409 | 4.88582  | 5.756659 | 4.987519 | 0.003907 |
| 6.515513 | 4.83375  | 4.855828 | 5.222295 | 6.228149 | 5.198222 | 4.649803 | 6.079077 | 0.003131 |
| 5.625103 | 3.707385 | 3.955271 | 3.289177 | 4.205741 | 4.26321  | 3.481085 | 5.099199 | 0.001309 |
| 5.567768 | 3.500569 | 3.826318 | 3.854842 | 5.129228 | 4.536816 | 3.249968 | 4.270854 | 0.002073 |
| 5.366995 | 4.979752 | 3.285148 | 4.701547 | 4.483634 | 4.746206 | 4.434577 | 5.367514 | 0.003603 |
| 5.376005 | 4.095278 | 4.089625 | 4.835971 | 4.180013 | 4.130748 | 3.962314 | 5.028295 | 0.001437 |
| 3.846979 | 3.19197  | 2.844564 | 3.15658  | 2.825005 | 3.028065 | 2.620673 | 2.781336 | 0.000145 |
| 3.843522 | 3.18448  | 2.439797 | 3.360857 | 3.829545 | 3.469036 | 2.977295 | 3.106026 | 0.003556 |
| 2.752835 | 1.154713 | 1.305396 | 1.549826 | 1.442724 | 1.294849 | 1.266379 | 2.245653 | 0.00175  |
| 3.655093 | 3.763855 | 5.110259 | 4.200029 | 4.155509 | 4.634737 | 3.45741  | 3.767626 | 0.000579 |
| 5.579857 | 6.872865 | 6.927063 | 6.633176 | 6.307796 | 6.360562 | 6.870321 | 5.906419 | 0.00298  |

|          |          |          |          |          |          |          |          |          |
|----------|----------|----------|----------|----------|----------|----------|----------|----------|
| 3.728603 | 2.52029  | 3.230348 | 3.7194   | 3.89476  | 3.374464 | 3.159476 | 3.506766 | 0.000256 |
| 4.21729  | 3.743346 | 2.765291 | 2.799738 | 3.299808 | 4.003729 | 3.596876 | 3.458427 | 0.003843 |
| 4.021934 | 3.029756 | 2.502472 | 3.14469  | 4.333834 | 3.630055 | 3.020964 | 4.485567 | 0.00425  |
| 3.161254 | 1.92881  | 3.229465 | 2.273613 | 3.152014 | 2.885945 | 2.129312 | 3.170437 | 0.002403 |
| 4.328429 | 3.360763 | 2.943419 | 3.34426  | 3.672115 | 2.294637 | 4.027641 | 3.34787  | 0.002385 |
| 4.949127 | 3.644749 | 3.442089 | 3.650278 | 4.08506  | 4.734781 | 2.458139 | 4.438338 | 0.001919 |
| 4.89532  | 4.481525 | 5.575674 | 4.719874 | 4.789879 | 5.250826 | 3.915014 | 5.598553 | 0.000351 |
| 6.299867 | 6.547881 | 6.597561 | 5.493047 | 7.396496 | 7.706126 | 8.426417 | 8.18789  | 0.002655 |
| 4.105833 | 4.236271 | 3.612996 | 4.100885 | 5.120965 | 5.201462 | 4.108143 | 5.12517  | 0.00043  |
| 3.632779 | 4.02032  | 3.986095 | 3.360636 | 4.147708 | 4.189998 | 3.709456 | 4.827853 | 3.90E-05 |
| 3.920561 | 3.623509 | 2.25031  | 3.132821 | 5.405757 | 4.28585  | 3.748859 | 4.193973 | 0.001842 |
| 6.110223 | 4.837511 | 4.496233 | 4.728157 | 6.069741 | 6.619244 | 4.792555 | 5.409203 | 0.004083 |
| 3.346936 | 2.874258 | 1.737045 | 2.397625 | 3.79667  | 3.101508 | 2.895083 | 2.266409 | 0.000497 |
| 3.670061 | 2.971219 | 3.075271 | 2.930542 | 3.148243 | 3.411469 | 2.628602 | 4.682996 | 0.000816 |
| 5.195807 | 4.425319 | 3.573715 | 4.414234 | 4.073228 | 4.325691 | 4.130624 | 4.132819 | 0.000245 |
| 5.287317 | 4.777646 | 4.719026 | 4.625266 | 5.686901 | 5.465656 | 5.146066 | 4.973021 | 0.000237 |
| 5.49189  | 4.55074  | 2.748808 | 3.885114 | 4.588273 | 3.834775 | 3.074795 | 4.323077 | 0.001724 |
| 3.445325 | 3.701325 | 5.376812 | 3.975877 | 4.041694 | 3.786996 | 4.285651 | 3.068492 | 0.003126 |
| 3.71483  | 4.492102 | 3.148237 | 3.353573 | 3.737646 | 5.13313  | 3.947145 | 4.813399 | 0.000184 |
| 3.446836 | 3.625935 | 5.645802 | 5.525832 | 5.017074 | 4.873297 | 4.444621 | 4.780956 | 0.002642 |
| 4.902777 | 3.860142 | 3.097064 | 3.187461 | 4.054956 | 4.632023 | 2.362649 | 3.56243  | 0.002221 |
| 3.497003 | 2.960325 | 4.792236 | 4.166986 | 4.029756 | 4.025475 | 4.358053 | 4.454059 | 0.003533 |
| 4.361241 | 4.369694 | 5.214653 | 4.085448 | 4.22561  | 4.456016 | 3.377865 | 5.09606  | 0.004097 |
| 4.187839 | 2.611339 | 2.580551 | 2.325213 | 2.978812 | 2.905104 | 2.846504 | 3.059668 | 0.003731 |
| 3.839785 | 3.180993 | 3.830395 | 4.631903 | 3.972829 | 4.048147 | 3.477446 | 4.791808 | 0.000519 |
| 7.025353 | 7.654599 | 6.121068 | 6.583484 | 7.891334 | 8.084604 | 7.648929 | 7.727931 | 9.97E-05 |
| 5.044756 | 3.438623 | 2.806103 | 3.276236 | 4.300827 | 4.957883 | 3.223489 | 5.236382 | 0.003197 |
| 3.856198 | 2.44034  | 3.451079 | 4.543691 | 4.142888 | 3.390255 | 2.06719  | 3.53288  | 0.000235 |
| 4.993183 | 3.736432 | 2.957083 | 4.12193  | 5.507454 | 5.356423 | 4.127594 | 4.268173 | 0.00079  |
| 5.141042 | 4.863485 | 4.281245 | 4.693589 | 5.675761 | 5.119704 | 4.70053  | 4.824235 | 5.70E-05 |
| 4.687911 | 2.835631 | 3.387996 | 4.256418 | 5.380414 | 4.686379 | 3.939648 | 5.025877 | 0.004143 |
| 5.429121 | 3.71384  | 3.088574 | 3.956734 | 3.972811 | 4.463981 | 2.959889 | 4.550071 | 0.002255 |
| 4.513691 | 3.74099  | 5.017335 | 4.13055  | 4.818648 | 4.20143  | 4.380043 | 5.733463 | 0.000354 |
| 6.411173 | 5.994939 | 5.506576 | 5.939385 | 6.858415 | 6.869557 | 5.97406  | 6.639968 | 0.003459 |
| 4.879665 | 4.492502 | 4.053613 | 4.824383 | 4.998681 | 5.439925 | 4.066023 | 4.8712   | 2.65E-06 |
| 3.441036 | 2.664141 | 3.146717 | 2.734163 | 4.011278 | 3.235071 | 3.544224 | 2.989379 | 0.000223 |
| 5.908659 | 5.123055 | 3.676507 | 5.09956  | 5.767382 | 5.741086 | 4.887257 | 4.288824 | 0.001829 |
| 2.930588 | 1.340485 | 2.76821  | 3.083263 | 4.328907 | 3.832867 | 3.678482 | 3.848827 | 0.003478 |
| 3.784748 | 3.149154 | 3.513038 | 3.44426  | 3.327449 | 3.928353 | 3.172151 | 3.978429 | 0.002692 |
| 4.728014 | 3.090687 | 2.936024 | 3.278872 | 3.424076 | 4.265871 | 3.412614 | 3.869879 | 0.001473 |
| 3.163726 | 3.385649 | 4.285764 | 3.130493 | 3.772346 | 3.246464 | 3.010882 | 2.690111 | 0.001686 |
| 2.830935 | 1.652231 | 1.665614 | 1.945469 | 2.005059 | 2.853438 | 2.624643 | 3.066949 | 0.002615 |
| 6.187095 | 6.294561 | 6.127698 | 6.631757 | 6.277701 | 6.059174 | 6.418177 | 5.279134 | 1.05E-05 |
| 4.47165  | 4.009787 | 4.952111 | 4.765227 | 4.616671 | 4.950511 | 4.823475 | 5.248491 | 0.00033  |
| 4.97967  | 5.660284 | 6.334923 | 5.842328 | 4.806635 | 5.092135 | 5.51539  | 5.088448 | 0.001938 |
| 4.608392 | 3.814923 | 4.507386 | 4.310589 | 4.335707 | 4.262522 | 5.213664 | 4.699319 | 0.000171 |
| 4.207749 | 5.229084 | 3.764786 | 4.57921  | 4.301361 | 5.260123 | 4.181204 | 3.930343 | 0.003903 |

|          |          |          |          |          |          |          |          |          |
|----------|----------|----------|----------|----------|----------|----------|----------|----------|
| 5.483373 | 6.022104 | 7.170863 | 7.087979 | 6.146449 | 6.663985 | 6.996108 | 5.959887 | 0.003006 |
| 3.323777 | 2.875343 | 3.151361 | 2.086661 | 1.962452 | 2.878316 | 3.667503 | 2.245653 | 0.002527 |
| 4.344997 | 4.430705 | 4.950474 | 3.732681 | 4.366997 | 4.062298 | 4.711941 | 4.359927 | 0.000623 |
| 4.067635 | 3.608307 | 2.396875 | 3.287423 | 4.257524 | 4.856768 | 3.780435 | 3.442452 | 0.001548 |
| 5.249118 | 4.127132 | 3.319444 | 4.177957 | 5.146285 | 5.401249 | 4.168123 | 4.80666  | 0.001789 |
| 3.505937 | 2.704335 | 2.42813  | 1.764904 | 2.745179 | 3.539093 | 2.540355 | 2.495169 | 0.000973 |
| 3.342298 | 2.687565 | 2.283332 | 2.006862 | 2.98862  | 2.30615  | 2.082325 | 2.659811 | 0.001499 |
| 3.43885  | 3.931257 | 4.478902 | 4.086842 | 3.856649 | 4.252055 | 4.65219  | 3.541515 | 0.002443 |
| 5.118979 | 3.985109 | 3.697692 | 3.318701 | 4.571338 | 4.469272 | 3.590262 | 3.894724 | 0.001326 |
| 1.91313  | 3.0236   | 1.849929 | 1.67418  | 1.962452 | 2.23772  | 1.437736 | 1.71382  | 0.003829 |
| 3.21404  | 3.695576 | 3.877151 | 3.859813 | 4.111475 | 3.850586 | 4.525337 | 4.663898 | 0.000231 |
| 4.92219  | 4.829284 | 3.970172 | 4.529777 | 5.716819 | 5.49754  | 4.448752 | 3.692302 | 0.004095 |
| 4.128747 | 5.646428 | 5.869251 | 5.634482 | 5.292977 | 5.434034 | 5.324473 | 5.529911 | 0.002767 |
| 6.267888 | 6.90446  | 6.260657 | 6.516887 | 8.54937  | 7.272278 | 7.28316  | 6.880349 | 0.001339 |
| 5.818478 | 5.783053 | 5.911538 | 5.449851 | 4.896409 | 5.92863  | 5.43476  | 5.719028 | 0.000497 |
| 3.41942  | 2.6387   | 1.973749 | 2.278825 | 3.798087 | 2.604627 | 2.575398 | 3.338153 | 0.002349 |
| 4.811922 | 5.268494 | 5.204414 | 5.407781 | 5.074869 | 4.782529 | 5.093669 | 4.561938 | 0.004028 |
| 4.404056 | 3.345836 | 3.191307 | 3.345067 | 4.181183 | 4.908878 | 3.608169 | 3.069968 | 0.000788 |
| 5.098455 | 4.878841 | 5.124227 | 4.653027 | 5.20711  | 4.906289 | 4.886676 | 5.50637  | 0.000177 |
| 7.126055 | 7.38472  | 6.307151 | 6.034773 | 7.383044 | 6.78522  | 6.722678 | 7.623041 | 0.000349 |
| 2.35261  | 2.900192 | 3.214202 | 3.430781 | 3.033577 | 3.235729 | 3.397626 | 3.238276 | 0.000824 |
| 5.519548 | 5.418463 | 4.789432 | 4.884535 | 6.240834 | 6.086046 | 4.921277 | 4.865048 | 0.000657 |
| 3.321214 | 3.622224 | 2.382927 | 2.593281 | 3.661554 | 3.286719 | 2.614991 | 2.867614 | 0.000457 |
| 3.236214 | 2.052596 | 2.054898 | 3.179256 | 3.497237 | 2.669246 | 2.150673 | 2.582298 | 0.000133 |
| 4.345306 | 3.05499  | 2.673109 | 2.931127 | 3.549396 | 3.925553 | 2.603878 | 4.23708  | 0.003152 |
| 3.419272 | 3.621175 | 1.971096 | 3.550052 | 3.787302 | 4.571304 | 1.874783 | 2.466244 | 0.00285  |
| 2.869059 | 3.470609 | 4.283733 | 4.485914 | 4.577525 | 4.879051 | 4.737566 | 3.387501 | 0.003649 |
| 4.871843 | 4.52046  | 4.551532 | 4.327449 | 5.083781 | 6.120386 | 5.720517 | 5.425297 | 0.001543 |
| 3.758312 | 1.6499   | 1.881842 | 1.610211 | 1.724329 | 2.028204 | 1.569449 | 2.310846 | 0.004175 |
| 5.332075 | 2.736966 | 2.980796 | 2.922467 | 4.703449 | 3.893788 | 3.45519  | 4.638814 | 0.004295 |
| 8.821228 | 8.22668  | 7.458128 | 8.469063 | 7.646573 | 8.220576 | 8.947045 | 7.37793  | 0.000218 |
| 6.082913 | 5.279338 | 5.373451 | 5.868981 | 6.588234 | 6.361189 | 5.857606 | 6.201142 | 1.69E-05 |
| 1.61038  | 1.650725 | 1.606856 | 2.16808  | 1.573027 | 2.584921 | 1.616992 | 2.516463 | 0.001831 |
| 5.985292 | 4.894636 | 3.914698 | 4.811944 | 5.039524 | 5.76611  | 4.700621 | 5.413374 | 0.000621 |
| 3.568493 | 3.320034 | 3.452731 | 3.673609 | 3.803261 | 4.591577 | 2.956762 | 2.859637 | 0.000615 |
| 6.173114 | 5.117708 | 4.251231 | 5.122    | 5.347027 | 6.002246 | 3.432952 | 4.326443 | 0.001857 |
| 6.431315 | 3.478494 | 4.777536 | 4.848164 | 5.448415 | 4.959761 | 4.715562 | 4.427115 | 0.002192 |
| 4.85462  | 5.472096 | 6.214855 | 5.976449 | 5.86282  | 5.681173 | 7.107157 | 5.793377 | 0.001223 |
| 6.123324 | 5.350835 | 4.901727 | 4.646984 | 5.24637  | 5.592562 | 5.087468 | 5.916956 | 0.002394 |
| 4.369472 | 4.661489 | 3.071039 | 3.946813 | 3.34902  | 3.279727 | 2.65959  | 3.911034 | 0.003174 |
| 4.446916 | 3.74943  | 4.245822 | 3.613381 | 4.145947 | 3.514285 | 2.445255 | 4.517156 | 0.00172  |
| 3.923991 | 3.545101 | 4.413762 | 4.941567 | 3.649163 | 4.909372 | 4.77826  | 3.744502 | 0.001493 |
| 5.001841 | 3.242635 | 2.980547 | 3.498399 | 3.851803 | 4.18862  | 3.179194 | 4.161429 | 0.002752 |
| 4.626033 | 2.835042 | 2.587537 | 3.582819 | 4.127988 | 4.298167 | 2.536633 | 4.161621 | 0.00325  |
| 3.126897 | 3.589562 | 3.26628  | 4.178456 | 3.966674 | 3.837436 | 3.621606 | 4.519208 | 0.001625 |
| 3.157144 | 2.955734 | 4.403542 | 3.893452 | 3.894622 | 3.931146 | 3.850449 | 3.080088 | 0.000244 |
| 4.915763 | 4.564851 | 4.445051 | 5.434045 | 4.575302 | 5.182888 | 4.388681 | 5.223666 | 0.000137 |

|          |          |          |          |          |          |          |          |          |
|----------|----------|----------|----------|----------|----------|----------|----------|----------|
| 3.153379 | 1.415226 | 1.974746 | 2.328476 | 2.514608 | 2.200617 | 2.809613 | 3.458226 | 0.001166 |
| 3.116405 | 2.747707 | 2.125952 | 2.297905 | 2.283769 | 2.029203 | 2.32401  | 2.517444 | 2.67E-05 |
| 5.35715  | 5.058624 | 4.403131 | 4.442165 | 5.230095 | 4.274583 | 4.360052 | 5.665574 | 0.002291 |
| 3.486832 | 2.984928 | 5.48189  | 4.84259  | 3.709604 | 4.104587 | 4.031631 | 4.054742 | 0.000175 |
| 4.627106 | 5.440549 | 3.794791 | 3.577967 | 3.877495 | 4.409231 | 4.444621 | 4.518208 | 0.001248 |
| 1.868212 | 2.683564 | 2.271596 | 2.127403 | 2.558688 | 2.013438 | 2.671343 | 2.159632 | 9.75E-05 |
| 4.762311 | 3.421551 | 3.370294 | 3.268055 | 4.441806 | 4.598193 | 3.190204 | 4.280864 | 0.000802 |
| 5.867654 | 4.461603 | 3.588224 | 3.421332 | 4.401462 | 5.968508 | 4.281681 | 5.12315  | 0.0008   |
| 4.524674 | 3.777744 | 2.6943   | 4.192302 | 4.487597 | 4.880461 | 3.227548 | 5.021354 | 0.000328 |
| 3.293129 | 1.957616 | 2.180831 | 2.523493 | 2.957455 | 2.36463  | 1.651774 | 3.203958 | 0.000391 |
| 6.738888 | 5.591086 | 5.269545 | 5.979391 | 5.976586 | 5.776247 | 5.573363 | 6.189845 | 8.74E-06 |
| 5.791213 | 4.63547  | 3.641902 | 4.851443 | 4.155431 | 4.504104 | 4.252235 | 4.233441 | 0.002501 |
| 3.179629 | 2.655125 | 2.799004 | 2.648601 | 2.367587 | 3.822026 | 2.3409   | 3.279839 | 0.000493 |
| 2.416718 | 1.642383 | 2.242131 | 1.864921 | 2.744261 | 2.740136 | 2.06719  | 3.103199 | 0.001785 |
| 4.801939 | 3.834435 | 3.990809 | 4.942485 | 4.875523 | 4.497678 | 3.939744 | 5.068385 | 0.001554 |
| 4.706433 | 3.714234 | 3.184154 | 3.790847 | 3.840809 | 4.020334 | 4.690101 | 3.895895 | 0.002695 |
| 5.771956 | 4.155582 | 2.295204 | 4.270401 | 4.495252 | 5.378428 | 4.358221 | 5.646882 | 0.004267 |
| 4.6452   | 6.258765 | 5.629872 | 5.685036 | 5.108177 | 4.535499 | 5.982935 | 5.141386 | 0.003991 |
| 6.083781 | 5.087453 | 4.487314 | 4.793151 | 4.954932 | 5.915548 | 4.358003 | 5.028202 | 0.00208  |
| 4.638227 | 3.603957 | 2.889889 | 4.794961 | 3.336623 | 3.550452 | 4.241142 | 4.427115 | 0.003997 |
| 6.300222 | 5.037422 | 4.877078 | 4.927682 | 5.920101 | 6.108405 | 5.849618 | 5.305034 | 0.002191 |
| 5.026316 | 5.596839 | 6.495982 | 5.941316 | 5.739619 | 6.20366  | 6.431951 | 5.913018 | 0.002293 |
| 8.441441 | 8.599774 | 8.048782 | 8.292876 | 8.203386 | 9.347824 | 7.963556 | 8.101781 | 0.000255 |
| 5.087184 | 3.882511 | 3.380026 | 4.12449  | 4.913167 | 4.640222 | 3.615362 | 4.355787 | 0.004275 |
| 2.650921 | 2.696593 | 2.80112  | 2.810175 | 3.35057  | 3.545307 | 3.097744 | 3.716509 | 3.36E-06 |
| 2.142469 | 2.305905 | 2.679369 | 2.420525 | 2.104924 | 2.102327 | 2.720234 | 2.596799 | 0.000438 |
| 4.916548 | 4.225998 | 5.601422 | 5.512818 | 4.62711  | 5.28885  | 4.813738 | 4.326652 | 0.000315 |
| 6.284335 | 6.162009 | 6.374525 | 6.606615 | 7.274454 | 6.266168 | 6.618489 | 7.295394 | 0.001364 |
| 4.587262 | 2.749872 | 4.214548 | 3.407796 | 3.432094 | 3.718364 | 2.82164  | 3.722394 | 0.003431 |
| 6.434008 | 5.696515 | 4.901053 | 4.946545 | 6.440804 | 6.689051 | 5.040315 | 5.472823 | 0.00326  |
| 4.969086 | 4.656297 | 5.561408 | 5.780517 | 5.212784 | 5.579934 | 5.324552 | 4.503335 | 0.000463 |
| 4.747376 | 5.023663 | 6.143051 | 6.004838 | 5.737355 | 5.125698 | 5.781333 | 5.604538 | 0.002897 |
| 4.479498 | 2.072628 | 2.157184 | 2.408555 | 3.759505 | 2.93086  | 3.725052 | 4.204313 | 0.003178 |
| 4.432032 | 3.173315 | 5.091758 | 5.600019 | 4.728084 | 3.390255 | 3.145371 | 5.002519 | 0.001446 |
| 3.347455 | 4.214903 | 4.817857 | 3.881842 | 4.194595 | 3.846107 | 3.750112 | 4.6864   | 0.001364 |
| 4.145407 | 2.818656 | 2.713004 | 3.337714 | 4.711365 | 3.266632 | 4.283722 | 3.693388 | 0.002977 |
| 6.065852 | 4.059282 | 3.915649 | 4.101418 | 5.309508 | 5.733004 | 4.32243  | 5.279879 | 0.001985 |
| 3.536734 | 2.572361 | 4.755979 | 3.990144 | 2.665965 | 3.785426 | 4.432817 | 3.149175 | 0.003884 |
| 3.151894 | 2.939708 | 4.132039 | 3.370123 | 3.790141 | 3.961307 | 3.513172 | 4.050344 | 0.000275 |
| 3.970205 | 4.217345 | 2.945109 | 3.262268 | 4.827827 | 4.322071 | 3.088147 | 5.002144 | 0.001015 |
| 2.763972 | 1.948649 | 2.184422 | 3.072179 | 3.291025 | 3.001496 | 2.393482 | 2.515277 | 0.002951 |
| 3.579452 | 5.283154 | 5.000348 | 4.797947 | 4.771588 | 4.981613 | 4.628972 | 3.828321 | 0.002618 |
| 4.642385 | 4.069246 | 3.364467 | 3.532683 | 5.134169 | 4.843175 | 3.525598 | 4.181851 | 0.001827 |
| 2.842893 | 4.53299  | 3.368561 | 3.237883 | 3.39495  | 3.749111 | 2.774143 | 4.009133 | 0.001571 |
| 6.452296 | 4.989037 | 4.844607 | 5.054023 | 5.843913 | 5.543187 | 5.04985  | 6.005552 | 0.000819 |
| 3.078292 | 3.54241  | 4.619632 | 4.244099 | 3.198694 | 3.85564  | 4.159377 | 3.43563  | 0.002248 |
| 3.927188 | 4.160054 | 6.129859 | 5.504253 | 3.786063 | 5.131101 | 5.059969 | 4.964349 | 0.003965 |

|          |          |          |          |          |          |          |          |          |
|----------|----------|----------|----------|----------|----------|----------|----------|----------|
| 3.334505 | 4.303327 | 5.137426 | 4.362656 | 3.479198 | 3.530693 | 3.69125  | 4.383356 | 0.003141 |
| 4.580231 | 4.679259 | 4.853287 | 4.896998 | 5.210691 | 4.93756  | 4.707727 | 6.111828 | 0.002755 |
| 5.220316 | 4.27569  | 5.675421 | 5.992038 | 4.702928 | 5.874887 | 4.968053 | 4.844765 | 0.002936 |
| 4.780146 | 4.057438 | 3.546031 | 2.988825 | 4.351402 | 5.061507 | 3.211062 | 4.467904 | 0.001453 |
| 4.915512 | 4.265091 | 4.491469 | 5.05834  | 4.728084 | 4.280589 | 4.795318 | 3.98669  | 0.001502 |
| 4.684795 | 5.127618 | 6.727662 | 6.233564 | 5.781688 | 6.176001 | 6.244166 | 5.944578 | 0.001483 |
| 5.710162 | 4.209078 | 3.774993 | 3.899152 | 4.883332 | 4.403153 | 4.322954 | 4.838939 | 0.001772 |
| 5.213186 | 4.760027 | 3.712721 | 4.660372 | 4.985414 | 3.755334 | 4.656721 | 4.28323  | 0.000645 |
| 2.895229 | 3.356905 | 5.225726 | 4.388606 | 3.741199 | 3.540468 | 3.285086 | 3.658806 | 0.001444 |
| 1.654148 | 2.302365 | 1.998913 | 4.18283  | 2.094313 | 1.780514 | 1.716896 | 2.310846 | 0.000613 |
| 6.127094 | 5.588184 | 6.089217 | 6.29072  | 7.041726 | 5.903237 | 6.177107 | 5.582643 | 2.20E-05 |
| 4.128747 | 4.653194 | 5.443019 | 5.440299 | 4.746942 | 3.301459 | 4.53062  | 4.493524 | 0.002456 |
| 6.954072 | 6.548629 | 6.009281 | 6.122369 | 6.824615 | 5.632038 | 6.867512 | 6.462944 | 1.27E-05 |
| 5.652641 | 5.599372 | 5.952626 | 5.634482 | 5.420919 | 5.368973 | 5.681742 | 5.478213 | 0.000394 |
| 5.0122   | 5.540983 | 6.390967 | 5.594895 | 5.49112  | 5.620815 | 5.422624 | 5.301771 | 0.000137 |

qValue

0.039135  
0.02624  
0.049472  
0.021871  
0.036755  
0.049837  
0.023067  
0.00732  
0.0203  
0.048864  
0.000274  
0.005219  
0.045847  
0.047847  
0.042399  
0.036755  
0.0203  
0.033289  
0.045847  
0.042399  
0.036755  
0.018861  
0.045847  
0.021871  
0.045847  
0.046048  
0.044048  
0.045923  
0.036755  
0.014259  
0.049472  
0.020713  
0.017159  
0.042774  
0.033225  
0.045847  
0.036755  
0.023067  
0.033225  
0.042399  
0.047847  
0.002409  
0.036755  
0.016365  
0.045847

0.045847  
0.042399  
0.045847  
0.021871  
0.020592  
0.049837  
0.049472  
0.045847  
0.043629  
0.034823  
0.045961  
0.045847  
0.041456  
0.036755  
0.036755  
0.049115  
0.021871  
0.033289  
0.048864  
0.011689  
0.036755  
0.00732  
0.049115  
0.021871  
0.023067  
0.049115  
0.038819  
0.049472  
0.021871  
0.005219  
0.018328  
0.045847  
0.049892  
0.042628  
0.046637  
0.047763  
0.049115  
0.045847  
0.036755  
0.041456  
0.047847  
0.036755  
0.016658  
0.047847  
0.038819  
0.023067  
0.045847



0.018328  
0.049115  
0.049837  
0.042774  
0.042774  
0.039573  
0.0203  
0.044494  
0.021871  
0.007443  
0.038819  
0.049472  
0.021871  
0.027475  
0.018328  
0.018328  
0.038819  
0.045847  
0.017593  
0.044494  
0.042399  
0.047763  
0.049472  
0.048864  
0.021871  
0.014283  
0.045847  
0.018328  
0.027475  
0.010213  
0.049472  
0.042399  
0.0203  
0.047427  
0.002409  
0.018328  
0.038819  
0.047464  
0.044641  
0.036755  
0.038661  
0.044394  
0.005024  
0.0203  
0.03967  
0.017533  
0.049115

0.045847  
0.043629  
0.023492  
0.036755  
0.038819  
0.032047  
0.036755  
0.043188  
0.036755  
0.049115  
0.018328  
0.049472  
0.045051  
0.036755  
0.021871  
0.042774  
0.049472  
0.027475  
0.017533  
0.0203  
0.027475  
0.024145  
0.021871  
0.016365  
0.045847  
0.045847  
0.048192  
0.036755  
0.049654  
0.049837  
0.018328  
0.005219  
0.038819  
0.023492  
0.023492  
0.038839  
0.042399  
0.036755  
0.042774  
0.045847  
0.038819  
0.036755  
0.045051  
0.045923  
0.037555  
0.018328  
0.016365

0.035545  
0.006379  
0.042399  
0.017533  
0.036755  
0.014283  
0.027475  
0.027475  
0.0203  
0.020892  
0.005012  
0.043629  
0.021871  
0.038819  
0.036755  
0.044641  
0.049837  
0.049472  
0.041456  
0.049472  
0.042399  
0.042399  
0.018328  
0.049837  
0.002409  
0.021871  
0.0203  
0.036755  
0.047273  
0.045923  
0.021871  
0.045847  
0.045847  
0.036755  
0.036755  
0.045847  
0.040341  
0.049115  
0.018861  
0.03306  
0.045847  
0.044394  
0.038819  
0.036755  
0.027475  
0.042399  
0.049472

0.045847  
0.045051  
0.045847  
0.036755  
0.036755  
0.036755  
0.038819  
0.023996  
0.036755  
0.023492  
0.00573  
0.043188  
0.005218  
0.020892  
0.016365
